# 1 **Towards a catalog of pome tree architecture genes: the draft**

## 2 **‘d’Anjou’ genome (*Pyrus communis* L.)**

### 3 *Innovating towards architecture genes in pear*

4 **Huiting Zhang**<sup>1,2</sup>, **Eric K. Wafula**<sup>3</sup>, **Jon Eilers**<sup>1</sup>, **Alex E. Harkess**<sup>4,5</sup>, **Paula E. Ralph**<sup>3</sup>, **Prakash Raj**  
5 **Timilsena**<sup>3</sup>, **Claude W. dePamphilis**<sup>3</sup>, **Jessica M. Waite**<sup>1</sup>, **Loren A. Honaas**<sup>1\*</sup>

6 1. USDA, ARS, Tree Fruit Research Laboratory, Wenatchee, WA, United States 98801

7 2. Department of Horticulture, Washington State University, Pullman, WA, United States 99163

8 3. Department of Biology, The Pennsylvania State University, University Park, PA, United States  
9 16802

10 4. College of Agriculture, Auburn University, Auburn, AL, United States 36849

11 5. HudsonAlpha Institute for Biotechnology, Huntsville, AL, United States 35806

12 Email addresses:

13 **Huiting Zhang:** [huiting.zhang@wsu.edu](mailto:huiting.zhang@wsu.edu) ; **Eric K. Wafula:** [ekw10@psu.edu](mailto:ekw10@psu.edu) ; **Jon Eilers:**

14 [jon.eilers@usda.gov](mailto:jon.eilers@usda.gov) ; **Alex E. Harkess:** [aharkess@hudsonalpha.org](mailto:aharkess@hudsonalpha.org) ; **Paula E. Ralph:** [per125@psu.edu](mailto:per125@psu.edu) ;

15 **Prakash Raj Timilsena:** [prr119@psu.edu](mailto:prr119@psu.edu); **Claude W. dePamphilis:** [cwg3@psu.edu](mailto:cwd3@psu.edu) ; **Jessica M. Waite:**

16 [jessica.waite@usda.gov](mailto:jessica.waite@usda.gov) ; **Loren A. Honaas:** [loren.honaas@usda.gov](mailto:loren.honaas@usda.gov)

17

18 \* Corresponding author:

19 Loren A. Honaas

20 Tree Fruit Research Laboratory, USDA-ARS, 1104 N. Western Ave, Wenatchee, WA 98801

21 Telephone: 509-664-2280 x 211; Mobile: 509-433-1143; Fax: 509-664-2287

22

## 23 **Abstract**

24 The rapid development of sequencing technologies has led to a deeper understanding of  
25 horticultural plant genomes. However, experimental evidence connecting genes to important  
26 agronomic traits is still lacking in most non-model organisms. For instance, the genetic  
27 mechanisms underlying plant architecture are poorly understood in pome fruit trees, creating a  
28 major hurdle in developing new cultivars with desirable architecture, such as dwarfing rootstocks  
29 in European pear (*Pyrus communis*). Further, the quality and content of genomes vary widely.  
30 Therefore, it can be challenging to curate a list of genes with high-confidence gene models  
31 across reference genomes. This is often an important first step towards identifying key genetic  
32 factors for important traits. Here we present a draft genome of *P. communis* ‘d’Anjou’ and an  
33 improved assembly of the latest *P. communis* ‘Bartlett’ genome. To study gene families involved  
34 in tree architecture in European pear and other rosaceous species, we developed a workflow  
35 using a collection of bioinformatic tools towards curation of gene families of interest across  
36 genomes. This lays the groundwork for future functional studies in pear tree architecture.  
37 Importantly, our workflow can be easily adopted for other plant genomes and gene families of  
38 interest.

39

## 40 **Introduction**

41 Advancements in plant genome sequencing and assembly have vigorously promoted research in  
42 non-model organisms. In horticultural species, new genome sequences are being released every  
43 month<sup>1-6</sup>. These genomes have broadened our understanding of targeted cultivars and provided  
44 fundamental genomic resources for molecular breeding and more in-depth studies of  
45 economically important crop traits such as those involved in plant architecture. Although many

46 gene families have been identified as important for architectural traits, such as dwarfing,  
47 weeping, and columnar growth<sup>7</sup>, the study of these genes and their functionality in new species is  
48 still hampered by inaccurate information about their gene models or domain structures, and the  
49 frequent lack of 1:1 orthology between related genes of different study species. Sequencing and  
50 annotating a diversity of related genomes are crucial steps for obtaining this level of information.  
51  
52 Crops, most of which have gone through more than ten thousand years of domestication to meet  
53 human requirements, have a wide diversity in forms, sometimes even within the same species<sup>8</sup>.  
54 One such example is in the *Brassica* species, where *B. rapa* encompasses morphologically  
55 diverse vegetables such as Chinese cabbage, turnips, and mizuna; and cabbage, stem kale, and  
56 Brussels sprouts are the same biological species, *B. oleracea*. Therefore, a single reference  
57 genome does not represent the complex genome landscape, or pan-genome, for a single crop  
58 species. To understand the genetic basis of the diverse *Brassica* morphotypes, many attempts  
59 have been made to explore the genomes of *Brassica*<sup>8-12</sup>. In one of those attempts, genomes from  
60 199 *B. rapa* and 119 *B. oleracea* accessions were sequenced and analyzed using a comparative  
61 genomic framework<sup>10,12</sup>. Genomic selection signals and candidate genes were identified for traits  
62 associated with leaf-heading and tuber-forming morphotypes. Compared to *Brassica*, pome fruits  
63 may not appear to have as much diversity in their vegetative appearance, but they do have great  
64 diversity in terms of fruit quality, rootstock growth and performance, and post-harvest  
65 physiology. However, genome studies and pan-genome scale investigations in pome fruits are  
66 still in their infancy. In cultivated apple (*Malus domestica*), genomes of three different  
67 cultivars<sup>13-16</sup> have been published, providing resources to study: 1) small (SNPs and small  
68 InDels) and large scale (chromosome rearrangements) differences that can help explain cultivar

69 diversity, and 2) gene content differences that may contribute to cultivar specific traits. However,  
70 genomic resources for European pear (*Pyrus communis*) cultivars are limited to just two  
71 published genomes<sup>17,18</sup> from a single cultivar, ‘Bartlett’. More European pear genomes will  
72 afford new perspectives that help us understand shared and unique traits for important cultivars  
73 in *Pyrus*, as well as other Rosaceae.

74

75 Besides understanding large scale genomic characteristics, new genomes also provide rich  
76 resources for reverse genetic studies<sup>19,20</sup>. To obtain the actual sequence of a target gene, reverse  
77 genetic approaches in the pre-genome era relied on sequence and domain homology and  
78 technologies such as RACE PCR<sup>21</sup>, which could be challenging and time consuming.

79 Alternatively, in species with high-quality reference genomes, the annotation is generally  
80 considered to contain all the genes and target genes could ideally be identified with a sequence  
81 similarity search (*i.e.*, BLAST). However, reports of annotation errors, such as imperfect gene  
82 models and missing functional genes are very common<sup>22,23,24</sup>. Another complicating factor is that  
83 duplication events (*i.e.*, whole genome duplication, regional tandem duplication) and polyploidy  
84 occur in the majority of flowering plants, including most crop species, posing substantial  
85 challenges to genome assembly and annotation<sup>25</sup>. Moreover, instances of neofunctionalization  
86 and subfunctionalization occur frequently following duplication events<sup>26</sup>, which sometimes will  
87 result in large and complex gene families<sup>27,28</sup>. Therefore, a one-to-one relationship between a  
88 gene in a model organism and its ortholog in other plant species, or even between closely related  
89 species and varieties, is rare<sup>29</sup>. Without understanding the orthology and paralogy between  
90 members of a given gene family, it is difficult to translate knowledge of a gene in a model  
91 organism to another species of interest.

92

93 In the present study, we assembled a draft genome for the European pear cultivar ‘d’Anjou’,  
94 improved the current ‘Bartlett’ assembly (*i.e.*, Bartlett.DH\_V2), and developed a workflow that  
95 allows highly efficient target gene identification in any plant genome of interest. We used our  
96 workflow to curate and improve gene models for architecture-related genes from both the  
97 polished Bartlett.DH\_v2 and the d’Anjou genomes. Importantly, we recovered many genes that  
98 were missing from gene families of interest (50 genes in the cultivar ‘Bartlett’) and corrected  
99 errors in others across the genus *Pyrus*. This work demonstrates that the integration of  
100 comparative genomics and phylogenomics can facilitate and enhance gene annotation, and thus  
101 gene discovery, in important plant reference genomes.

102

## 103 **Results**

### 104 **The draft d’Anjou genome**

#### 105 *Genome assembly*

106 We generated approximately 134 million paired-end reads from Illumina HiSeq and a total of  
107 1,054,992 PacBio continuous long reads (CLR) with a read length N50 of 20 Kb, providing an  
108 estimated 67-fold and 21-fold coverage respectively of the expected 600 Mb *Pyrus communis*  
109 genome<sup>18</sup>. Additionally, approximately 468 million 2 x 150 bp paired reads (~234-fold coverage)  
110 with an estimated mean molecule length (linked-reads) of 20 kb were generated using 10x  
111 Genomics Chromium Technology (Supplementary Table 1). The final meta-assembly, generated  
112 with a combination of the three datasets, contains 5,800 scaffolds with a N50 of 358 Kb (Table  
113 1). The cleaned contigs and scaffolds were ordered and oriented into 17 pseudochromosomes  
114 guided by the reference genome, *Pyrus communis* ‘Bartlett.DH\_v2’<sup>17</sup>.

115

116 Next, we compared the d'Anjou meta-assembly to two published reference assemblies of  
117 Bartlett<sup>17,18</sup> to assess assembly contiguity, completeness, and structural accuracy. The  
118 Benchmarking Universal Single-Copy Ortholog (BUSCO)<sup>30</sup> analysis showed that the d'Anjou  
119 genome captured 96.6% complete genes in the Embryophyta gene sets, comparable to the  
120 reference genomes (Table 1, Supplementary Table 2). Furthermore, synteny comparisons  
121 between the draft d'Anjou genome and the reference Bartlett.DH\_v2 genome showed high  
122 collinearities at both whole-genome and chromosomal levels (Fig. 1a and Supplementary Fig. 1).

123

#### 124 *Annotation*

125 Combining information such as *de novo* transcriptome assembly, homologous proteins of closely  
126 related species, and protein-coding gene annotations from the two Bartlett genomes, we  
127 identified a total of 45,981 protein coding genes in d'Anjou (Table 1). Of those putative genes  
128 76.63% were annotated with functional domains from Pfam<sup>31</sup> and the remaining are supported by  
129 annotation evidence, primarily d'Anjou RNA-Seq reconstructed transcript<sup>32</sup>. These results  
130 indicate that we captured a large majority of the gene space in the d'Anjou genome. This affords  
131 a range of analyses including gene and gene family characterization, plus global-scale  
132 comparisons with other Rosaceae including the 'Bartlett' cultivar.

133

#### 134 **Comparison among three European pear genomes**

135 To study the shared and genotype-specific genes among the three European pear genomes, we  
136 constructed 25,511 protein clusters, comprising 77.71% of all the genes. While numbers of  
137 predicted genes from the Bartlett\_v1 and d'Anjou genomes may be overestimated due to the

138 presence of alternative haplotype segments in the assembly caused by high heterozygosity<sup>17</sup>, this  
139 should have very little effect on orthogroup circumscription. Further, the process of creating a  
140 double haploid reduces genome heterozygosity, but should retain estimates of orthogroup  
141 content. Hence, we formulated the following hypotheses: 1) a large majority of gene families are  
142 shared by all three genotypes; 2) few genotype-specific gene families are present in each  
143 genome; 3) the commercial ‘Bartlett’ genotype and the double haploid “Bartlett’ genotype  
144 (roughly version 1.0 and 2.0 of this genome, respectively) should have virtually identical gene  
145 family circumscription; and 4) we should detect very few gene families that are unique to either  
146 ‘Bartlett’ genome and shared with ‘d’Anjou’. The protein clustering analysis results (Table 1,  
147 Fig. 1b) support our hypotheses 1 and 2: 65.60% of the orthogroups contain genes from all three  
148 genotypes and only 0.12% of the orthogroups are species-specific. However, among the 8,744  
149 orthogroups containing genes from two genotypes, more than half (55.11%) are shared between  
150 d’Anjou and Bartlett\_v1, 18.10% are shared by d’Anjou\_v1 and Bartlett.DH\_v2, and only  
151 26.80% are shared between the two Bartlett genomes, which does not support hypotheses 3 and  
152 4.

153  
154 To better understand why these hypotheses lacked support, we took a broader look at gene  
155 family content by comparing a collection of Rosaceae genomes, including the pear genomes in  
156 question. We assigned all the predicted protein coding genes from genomes of interest<sup>13–15,17,18</sup> to  
157 orthogroups constructed with a 26-genome scaffold, covering most of the major lineages of land  
158 plants (supplementary Fig. 2). Out of the 18,110 orthogroups from this database, *Prunus persica*,  
159 a rosaceous species included in the genome scaffold, has representative genes in 10,290  
160 orthogroups. Genes from most apple and pear genomes (Bartlett\_v1, d’Anjou\_v1, *Malus*

161 *domestica* HFTH\_v1.0, *M. domestica* GDDH13\_v1.1, *M. domestica* Gala\_v1.0, *M.*  
162 *sieversii*\_v1.0, *M. sylvestris*\_v1.0) are present in more than 9,800 orthogroups, however, genes  
163 from Bartlett.DH\_v2 were only found in 9,688 orthogroups (Table 1 & Supplementary Table 3).  
164 These results suggest there are many genes not annotated in the Bartlett.DH\_v2 genome.

165

## 166 **Genome-Wide identification of selected architecture genes**

### 167 *A selection of architecture genes*

168 With this new comparative genomic information, our next steps were two-fold: first, to leverage  
169 information from the three European pear genomes and other available Rosaceae genomes, to  
170 identify and improve a set of tree architecture-related gene models of interest, and second, to use  
171 these architecture gene families as a test case to investigate potential issues in the Bartlett.DH\_v2  
172 genome. Many aspects of tree architecture are important for improving pear growth and  
173 maintenance, harvest, ripening, tree size and orchard modernization, disease resistance, and soil  
174 microbiome interaction. Traits of interest include dwarfing and dwarfism, root system  
175 architecture traits, and branching and branch growth. We selected key gene families known to be  
176 involved (Table 2)<sup>33-64</sup>, particularly those that have been previously shown to influence  
177 architectural traits in fruit trees. The identification of genes within these families, as well as their  
178 genomic locations, correct gene models, and domain conservation, is an important early step in  
179 testing and understanding their relationships and functions.

180

### 181 *Overview of the gene identification workflow*

182 Here, we developed a high throughput workflow (Fig. 2), leveraging a subset of the best  
183 Rosaceae plant genomes, and a phylogenomic perspective to efficiently and accurately generate



184 lists of genes in gene families of interest and phylogenetic relationships of genes from different  
185 plant lineages. Our workflow, consisting of three main steps, implemented various functions  
186 from PlantTribes<sup>65</sup> (<https://github.com/dePamphilis/PlantTribes>) and other software<sup>66,67</sup> for  
187 targeted gene annotation.

188

### 189 *Step 1 - An initial gene list and preliminary phylogenies*

190 In Step 1, representative plant architecture genes obtained from the literature were assigned into  
191 orthogroups based on sequence similarity, giving us 22 orthogroups of interest (Supplementary  
192 Tables 4-5. Note that OG12636 is a monocot-specific orthogroup, thus not included in the  
193 downstream analysis of this section). In parallel, we classified all the genes annotated from 14  
194 Rosaceae genomes (Supplementary Fig. 2) into the same database. Next, Rosaceae genes  
195 assigned into the 21 orthogroups were integrated with sequences from the 26 scaffolding species  
196 for multiple sequence alignments, which were used to infer phylogeny. At the end of this step,  
197 we obtained our initial list of genes in each orthogroup and the phylogenetic relationships of  
198 each gene family.

199

200 After examining the 21 orthogroups, we identified 64, 105, 94, and 53 genes from *Prunus*  
201 *persica*, Gala\_v1, d'Anjou, and Bartlett.DH\_v2, respectively. A whole genome duplication  
202 (WGD) event occurred in the common ancestor of *Malus* and *Pyrus*<sup>14</sup>, but was not shared with  
203 *Prunus*. Therefore, we expect to see an approximate 1:2 ratio in gene numbers in most cases,  
204 which explains fewer genes in *Prunus* compared to Gala\_v1 and d'Anjou. However, the low  
205 gene count in Bartlett.DH\_v2 was unexpected. For instance, we observed a clade within a PIN  
206 orthogroup (OG1145) comprised of short *PIN* genes<sup>38</sup>, which seemed to lack genes from the

207 Bartlett.DH\_v2 genome altogether (Fig. 3a). One gene copy is found in *Prunus* and Rosoideae  
208 species, and two copies are found in most of the Maleae species, but none were identified in  
209 Bartlett.DH\_v2. In addition, in the four genomes mentioned above, we found a number of  
210 problematic genes (Supplementary Table 6), for example genes that appeared shorter than all  
211 other orthologs or contained unexpected indels likely due to assembly or annotation errors.

212

### 213 *Step 2 and 3 - Iterative reannotation of problematic gene models*

214 Inaccurate and missing gene models are common in any genome, especially in the early  
215 annotation versions<sup>23,24</sup>. In model organisms, such as human, mouse  
216 (<https://www.encodegenes.org/>), and *Arabidopsis* (<https://www.arabidopsis.org/>), gene  
217 annotations are continuously being improved using experimental evidence, improved data types  
218 (e.g. full-length RNA molecule sequencing), and both manual and computational curation.  
219 Building a better genome assembly is another way to detect additional genes. For instance, the  
220 BUSCO completeness score increased from 86.7% in the initial ‘Golden Delicious’ apple  
221 genome<sup>16</sup> to 94.9% in the higher-quality GDDH13 genome<sup>15</sup>, indicating that the latter genome  
222 captured approximately 120 more conserved single-copy genes. Hence, we hypothesized that the  
223 potentially missing and problematic gene models we observed in the two European pears could  
224 be improved by: 1) using additional gene annotation approaches; and 2) searching against  
225 improved genome assemblies.

226

227 To test whether further gene annotation would improve problematic gene models, we moved  
228 forward to Step 2 of our workflow, using results from Step 1 as inputs. For each orthogroup  
229 containing problematic European pear genes (Supplementary Table 6), we used a subset of high-

230 quality gene models from Rosids identified in Step 1 as inputs and re-annotated these gene  
231 families in the two pear genomes. After using a combination of annotation softwares and manual  
232 curation, we found a total of 98 genes from the d'Anjou genome, and reduced the number of  
233 problematic or incomplete genes from 34 to 3. In Bartlett.DH\_v2, we identified 20 complete  
234 genes that were not annotated in the original genome and improved the sequences of 7  
235 previously problematic genes, however, the total number of the selected architecture genes (73  
236 genes among which 15 were problematic or incomplete) was still notably lower than that of  
237 d'Anjou (98 with 3 incomplete genes) or Gala (105 with 15 being incomplete, see  
238 Supplementary Table 6). In Step 3, which involves iterative steps of phylogenetic analysis and  
239 targeted gene re-annotation, we added additional information such as the improved d'Anjou  
240 genes and RNA-seq datasets as new resources to annotate Bartlett.DH\_v2 genes, but found no  
241 improvements in identifying unannotated genes or improving problematic models.

242

243 Results gathered after the first iteration of Step 3 supported our hypothesis that extra annotation  
244 steps could help improve imperfect gene models and identify missing genes in the two targeted  
245 European pear genomes. However, there were still about 30 genes potentially missing in  
246 Bartlett.DH\_v2, which led us to test whether polishing the genome assembly would further  
247 improve problematic or missing gene models.

248

### 249 *Step 3 - Adding Bartlett.DH\_v2 genome polishing*

250 The quality of genome assembly is affected by many factors, including sequencing depth, contig  
251 contiguity, and post-assembly polishing. Attempts to improve a presumably high-quality genome  
252 are time consuming, and may prove useless if the genome is already in good condition. To

253 initially determine whether polishing the genome assembly would be useful, we first investigated  
254 the orthogroups with problematic Bartlett.DH\_v2 genes to seek for evidence of assembly derived  
255 annotation issues. Indeed, in most cases where we failed to annotate a gene from presumably the  
256 correct genomic region, we observed unexpected indels while comparing the Bartlett.DH\_v2  
257 genome assembly to other pear genomes (Supplementary Fig. 3 and Supplementary Table 7).  
258 Unexpected indels in the Bartlett.DH\_v2 genome were associated with incorrect gene models as  
259 well. For example, Fig. 3b shows a subset of amino acid sequence alignments for a specific  
260 member (*Pyrco\_BartlettDH\_13g21160*) of a PIN orthogroup (OG438) comprised of the long  
261 *PIN* genes<sup>38</sup>, in which the Bartlett.DH\_v2 gene model shared low sequence identity with  
262 orthologs from other Maleae species and *Prunus*. To validate the identity of the problematic gene  
263 models, we leveraged RNAseq data from various resources<sup>68-73</sup> and mapped them to the  
264 Bartlett.DH\_v2 gene models. In most cases where a conflict was present between the pear  
265 consensus, for a given gene of interest, and the Bartlett.DH\_v2 gene model, the reads supported  
266 the consensus (Fig. 3c). The frequent occurrence of truncated and missing genes in the  
267 Bartlett.DH\_v2 genome may be caused by assembly errors (*e.g.*, base call errors, adapter  
268 contamination) that create erroneous open reading frames. This observation provided us with the  
269 first piece of evidence that the differences in gene family content observed in the Bartlett.DH\_v2  
270 genome may not only be caused by misannotations, but also assembly issues.

271  
272 To further test whether improvement to the genome assembly would allow us to capture the  
273 problematic and missing genes, we polished the Bartlett.DH\_v2 genome with Illumina reads  
274 from the original publication<sup>17</sup>. We identified 98.40% complete BUSCOs in the polished  
275 genome assembly, a 1.90% increase compared to the original assembly (Supplementary Table 2).

276 Using the polished genome, we reiterated Step 3 of our workflow and annotated a total of 103  
277 genes in our gene families of interest, with only two gene models being incomplete  
278 (Supplementary Table 6). This new result doubled the number of genes we identified from the  
279 original genome annotation and brought the expected gene number into parity with other pome  
280 fruit genomes. This supports our hypothesis that genes were missing due to methodological  
281 reasons, and in this case, due to assembly errors.

282

### 283 **Curation of a challenging gene family: the IGT family**

284 Some gene families are more complex than others. For example, it is more difficult to study the  
285 evolution of resistance (R) genes than most BUSCO genes because the former is comprised of  
286 fast-evolving multigene families while the latter are universally conserved single-copy gene  
287 families. Within the architecture gene families we studied, the IGT family is more challenging  
288 than many others because members of this family have relatively low levels of sequence  
289 conservation outside of a few conserved domains<sup>74</sup>. Previous reports identified four major clades  
290 (LAZY1-like, DRO1-like, TAC1-like, and LAZY5-like) in this gene family<sup>34</sup>. Study of LAZY1  
291 in model species identified 5 conserved regions<sup>74</sup> (Fig 4c). The same domains are also present in  
292 other LAZY1-like and DRO1-like proteins and the first 4 domains are found in TAC1-like  
293 proteins across land plants<sup>75</sup>. LAZY5-like, the function of which is largely unknown, has only  
294 domains I and V. Early research of the *TAC1-like* and *LAZY1-like* IGT genes identified these  
295 genes as grass-specific<sup>76,77</sup>, as BLAST searches failed to find homologs in other plant lineages.

296

297 Using Arabidopsis and rice *IGT* genes as queries, our workflow identified five orthogroups  
298 (Supplementary Table 4), containing all the pre-characterized *IGT* genes in angiosperms. The

299 phylogeny constructed with these five orthogroups largely supported previous classification of  
300 the four clades<sup>34</sup>, and provided more information regarding the evolutionary history of this gene  
301 family (Fig. 4a and Supplementary Fig. 4). The TAC1-like clade, which is sister to the others, is  
302 divided into two monophyletic groups; one contains only monocots while the other has  
303 representatives from all the other angiosperm lineages. The LAZY1-like and LAZY5-like clades  
304 form one large monophyletic group, which is sister to the DRO1-like clade. Within Rosaceae, a  
305 near 1:2 ratio was expected between peach and pear due to the WGD in the common ancestor of  
306 the Maleaes. Compared to the six known peach *IGT* genes<sup>34</sup>, we found 11 orthologs in  
307 Bartlett.DH\_v2 (including 1 short gene, *Pycro\_BartlettDH\_LAZY.Chr10*, caused by an  
308 unexpected premature stop codon) and 9 in d'Anjou (*Pycro\_Danjou\_DRO.Chr2* and  
309 *Pycro\_Danjou\_LAZY.Chr10* failed to be annotated due to missing information in the genome).  
310 The resulting phylogeny (Fig. 4a) shows that we have now identified most of the expected *IGT*  
311 genes in European pears.

312

313 Besides low sequence similarity, *IGT* genes also have unique intron-exon arrangements, which  
314 are conserved across Arabidopsis and a few other plant species<sup>34,74,78</sup>. These genes all contain 5  
315 exons, but unlike most genes, the first exon only comprises six nucleotides and the last exon  
316 contains ~20 nucleotides. Annotation of short exons, especially when transcriptome evidence is  
317 limited, can be very challenging and skipping such exons could cause problems in gene  
318 discovery<sup>79-81</sup>. For instance, the annotation of *AtAPC11* (*At3g05870*) was inaccurate until Guo  
319 and Liu identified a single-nucleotide exon in this gene<sup>80</sup>.

320

321 To determine whether we captured the correct *IGT* gene models in the targeted genomes, we  
322 investigated the protein sequence alignments and gene features. In the original annotation, only  
323 three gene models (*Pyrco\_BartlettDH\_16g10510*, *Pyrco\_BartlettDH\_07g15250*,  
324 *Pyrco\_DAnjou\_Chr7v0.1\_17442.1*) have the correct intron-exon combination and the expected  
325 domains. In the iterative re-annotation steps of our workflow, we identified 6 additional accurate  
326 gene models leveraging sequence orthology and transcriptome evidence<sup>68-73</sup>. We further  
327 investigated all the sequences we identified as *IGT* genes, seeking the presence or absence of the  
328 expected domain features. However, even among gene models from the best annotated genomes  
329 used to construct the 26Gv2.0 database, only 45.16% (56/124) have the expected domain  
330 features (Indicated with an \* next to gene names in Fig. 4a) (LAZY5-like was not taken into  
331 consideration due to its unique structure). In most cases, although the signature *IGT* domain (II)  
332 is correctly identified in the genes, domains I and V are usually missing or incorrect, likely due  
333 to mis-annotation of the first and last short exons. In Rosaceae, besides *Bartlett.DH\_v2* and  
334 *d'Anjou*, 34.38% (33/96) had the expected domains (Fig. 4a). This finding motivated us to  
335 manually investigate the targeted genomes to annotate the *IGT* genes. Using the correct gene  
336 models as reference, plus a careful manual curation, we were able to annotate 19 complete gene  
337 models of 20 expected *IGT* genes from the two targeted pear genomes (Figs. 4b and 4c).

338

## 339 **Discussion**

340 A second European pear cultivar genome from 'd'Anjou' provided additional insights into gene  
341 families across Rosaceae. By leveraging perspectives from comparative genomics and  
342 phylogenomics, we developed a high-throughput workflow using a collection of bioinformatic

343 tools that takes a list of genes of interest from the literature and genomes of interest as input, and  
344 produces a curated list of the targeted genes in the query genomes.

345

346 In the case study presented here, candidate genes from 16 plant architecture-related gene families  
347 were identified from 14 Rosaceae genomes. The study of gene families consists primarily of two  
348 initial parts: first, identification of all the members in these families, and second, investigation of  
349 their phylogenetic relationships. Many attempts<sup>82-84</sup> to identify genes of interest from a genome  
350 have relied solely on a BLAST search querying a homolog from a model organism, which may  
351 be distantly related. However, such a method is insufficient in identifying all members of a large  
352 complex gene family or a fast-evolving and highly-divergent family, such as the *IGT* genes.

353 They may also incorrectly include genes in a gene family based only on one or a few highly  
354 conserved regions that are insufficient for gene family membership. Compared to a BLAST-only  
355 approach, the gene classification process in our workflow used a combination of BLAST and  
356 HMMER search of an objectively pre-classified gene family scaffold, which provides a better  
357 result by taking into consideration both sensitivity and specificity<sup>65</sup>. This allowed us to  
358 efficiently identify even very challenging genes. Moreover, phylogenetic relationships revealed  
359 by a small number of taxa, for instance using only one species of interest and one model  
360 organism, can be inaccurate. For example, in our phylogenetic analysis with rich taxon sampling,  
361 *PIN5-1* and *PIN5-2* from *Pyrus bretschneideri* are sisters to all other *PINs* (Supplementary Fig.  
362 5), challenging the phylogenetic relationship inferred with *PINs* only from *P. bretschneideri* and  
363 *Arabidopsis thaliana*<sup>61</sup>.

364



365 The iterative quality control steps in the workflow helped identify problems that existed in  
366 certain gene models and provided hints about where to make targeted improvements to important  
367 *Pyrus* genomic resources. The highly contiguous assembly of Bartlett.DH\_v2 provided a  
368 valuable reference to anchor the shorter scaffolds from d'Anjou, which is essential for a good  
369 annotation. On the other hand, the perspective afforded by the d'Anjou genome led us to  
370 examine the Bartlett.DH\_v2 genome assembly further. We developed and tested hypotheses  
371 regarding unexpected gene annotation patterns in the two targeted European pear genomes  
372 among various Maleae species and cultivars. This led to a polished assembly and improved  
373 annotations that allowed us to curate a high confidence list of candidate genes and gene models  
374 for downstream analyses. By adding targeted iterations of genome assembly and annotation, we  
375 now have a better starting point for reverse genetic analyses and understanding functionality of  
376 architecture-related genes in pears.

377

378 The challenges we encountered as we laid the groundwork for reverse genetics studies to  
379 understand pear architecture genes, and the approaches we took to evaluate and tackle these  
380 challenges, reinforce the idea that genome assembly and annotation are iterative processes. We  
381 found that relating gene accession IDs and inconsistent gene names back to gene sequences in  
382 various databases was often difficult and time consuming. Objective, global-scale gene  
383 classification, as we used here via PlantTribes<sup>65,85</sup>, can help researchers work across genomes  
384 and among various genome resources. Further, guidance from consortia such as AgBioData<sup>86</sup> is  
385 helping facilitate work such as we have described here that includes the acquisition and analysis  
386 of genome-scale data. Our starting point for understanding putative architecture genes in pear  
387 was with genes of interest from several plant species - an approach that many researchers will

388 find familiar. With genes of interest in hand, our workflow provides a comparative genome  
389 approach to efficiently identify, investigate, and then improve and/or validate genes of interest  
390 across genomes and genome resources.

391

## 392 **Materials and Methods**

### 393 **Plant materials and sequencing**

394 The 'd'Anjou' plants were purchased from Van Well's nursery in East Wenatchee, WA, USA  
395 and grown in the USDA ARS greenhouse #6 at Wenatchee, WA, USA. Fresh leaves (~1.5g)  
396 from one 'd'Anjou' plant were flash frozen and used for DNA extraction. A CTAB isolation  
397 protocol<sup>87</sup> was used to generate high-molecular-weight genomic DNA with the following  
398 modifications: the extraction was performed large scale in 100 ml of extraction buffer in a 250  
399 ml Nalgene centrifuge bottle; the isopropanol precipitation was performed at room temperature  
400 (~ 5 minutes) followed immediately by centrifugation; after a 15-minute incubation in the first  
401 pellet wash solution, the pellet was transferred to a 50 ml centrifugation tube via sterile glass  
402 hook before performing the second pellet wash; following the second pellet wash, centrifugation  
403 and air drying, the pellet was resuspended in 2 ml TE buffer (10 mM Tris, 1 mM EDTA, pH 8.0)  
404 and allowed to resuspend at 4 °C overnight. The concentration of the DNA was measured by a  
405 Qubit 2.0 fluorometer (Invitrogen) and 50 ug DNA was digested with RNase A (Qiagen, final  
406 concentration 10 ug/ml, 37 °C for 30 minutes) and then further cleaned up using the PacBio  
407 recommended, user-shared gDNA clean-up protocol  
408 (<https://www.pacb.com/search/?q=user+shared+protocols>) performed at large-scale with the  
409 DNA sample brought up to 2 ml with TE and all other volumes scaled up accordingly. The final  
410 pellet was resuspended in 100 ul TE. The final DNA concentration was measured by Qubit

411 fluorometer, and 500 ng was loaded onto a PFG (Bio-Rad CHEF) to check the size range. The  
412 DNA ranged in size from 15 Kb to 100 Kb with a mean fragment size around 50 Kb. The purity  
413 of the DNA as measured by the NanoDrop spectrophotometer (ThermoFisher) was 260/280 nm:  
414 1.91; 260/230 nm: 2.51. Cleaned-up gDNA was sent to the Penn State Genomics Core facility  
415 (University Park, PA, USA) for Pacbio and Illumina library construction and sequencing. A total  
416 of 10 ug gDNA was used to construct PacBio SMRTbell libraries and sequenced on a PacBio  
417 Sequel system. A small subset of the same gDNA was used to make Illumina TruSeq library and  
418 was sequenced on an Illumina HiSeq 2500 platform. In addition, 4 ug of the same gDNA was  
419 sent to the DNA technologies and Expression Analysis Core Laboratory at UC Davis (Davis,  
420 CA, USA) to construct an Illumina 10X Chromium library, which was sequenced on an Illumina  
421 NovaSeq 6000 sequencer.

422

### 423 **Genome assembly and post-assembly processing**

424 To create the initial backbone assembly of d'Anjou, Canu assembler v2.1.1<sup>88</sup> was used to correct  
425 and trim PacBio continuous long reads (CLR) followed by a hybrid assembly of Illumina short  
426 reads and PacBio CLR with MaSuRCA assembler v3.3.2<sup>89</sup>. Next, Supernova v2.1.1, the 10x  
427 Genomics *de novo* assembler<sup>90</sup>, was used to assemble linked-reads at five different raw read  
428 coverage depths of approximately 50x, 59x, 67x, 78x, and 83x based on the kmer estimated  
429 genome size, and the resulting phased assembly graph was translated to produce two parallel  
430 pseudo-haplotype sequence representations of the genome. The Supernova assembler can only  
431 handle raw data between 30- to 85-fold coverage of the estimated genome size. Therefore, the  
432 multi-coverage assemblies provide an opportunity to capture most of the genome represented in  
433 the ~234-fold coverage sequenced 10x Chromium read data. One of the pseudo-haplotypes at

434 each of the five coverages was utilized for subsequent meta-assembly construction to improve  
435 the backbone assembly using a combination of assembly metrics, including 1) contig and  
436 scaffold contiguity (L50), 2) completeness of annotated conserved land plants (embryophyta)  
437 single-copy BUSCO genes<sup>30</sup>, and 3) an assembly size closer to the expected d'Anjou haploid  
438 genome size. The backbone assembly was incrementally improved by bridging gaps and joining  
439 contigs with the Quickmerge program<sup>91</sup> using contigs from the five primary Supernova  
440 assemblies in decreasing order of assembly quality. The resulting meta-assembly at each  
441 merging step was only retained if improvement in contiguity, completeness, and assembly size  
442 was observed.

443

444 Next, the long-distance information of DNA molecules provided in linked-reads was used to  
445 correct assembly errors introduced in the meta-assembly during both the *de novo* and merging  
446 steps of the assembly process with Tigmint<sup>92</sup> and ARCS<sup>93</sup> algorithms. Tigmint aligns linked  
447 reads to an assembly to identify potential errors and breaks assembled sequences at the  
448 boundaries of these errors. The assembly is then re-scaffolded into highly contiguous sequences  
449 with ARCS utilizing the long-distance information contained in the linked reads. To further  
450 improve the d'Anjou meta-assembly, trimmed paired-reads from both the short insert Illumina  
451 and 10x Chromium libraries were utilized to iteratively fill gaps between contigs using GapFiller  
452 v1.10<sup>94</sup>, and correct base errors and local misassemblies with Pilon v1.23<sup>95</sup>. The genome  
453 assembly process is illustrated in Supplementary Fig. 6.

454

455 **Pseudomolecule construction**

456 Before constructing the d'Anjou nuclear chromosomal-scale pseudomolecules, extraneous DNA  
457 sequences present in meta-assembly were identified and excluded (Supplementary Fig. 6).  
458 Megablast searches with e-value < 1e-10 was performed against the NCBI nucleotide collection  
459 database (nt), and then the best matching Megablast hits (max\_target\_seqs = 100) against the  
460 NCBI taxonomy database were queried to determine their taxonomic attributions. Assembly  
461 sequences with all their best-matching sequences not classified as embryophytes (land plants)  
462 were considered contaminants and discarded. A second iteration of Megablast searches of all the  
463 remaining sequences (embryophytes) was performed against the NCBI RefSeq plant organelles  
464 database to identify chloroplast and mitochondrion sequences and assembly sequences with high  
465 similarity (> 80% identity; > 50% coverage) to plant organelle sequences were discarded<sup>27,96</sup>.  
466 Finally, the remaining meta-assembly nuclear contigs and scaffolds were ordered and oriented  
467 into chromosomal-scale pseudomolecules with RaGOO<sup>97</sup> using the European pear, *Pyrus*  
468 *communis* Bartlett.DH\_v2 genome<sup>17</sup> reference chromosomes (Supplementary Fig. 6).

469

#### 470 **Assembly validation**

471 Both the contig and scaffold assembly metrics were evaluated in addition to the completeness of  
472 universally conserved single-copy genes using the BUSCO land plants (embryophyta)  
473 benchmark gene set (Supplementary Table 8). Whole-genome synteny comparison between  
474 Bartlett.DH\_v2, the chromosome assembly of the Bartlett cultivar, and d'Anjou meta-assembly  
475 were evaluated with D-GENIES<sup>98</sup> using repeat masked (<http://www.repeatmasker.org>) DNA  
476 alignments performed with minimap2<sup>99</sup> for the whole genome and each of the 17 *Pyrus*  
477 *communis* chromosomes as shown in Fig. 1 and Supplementary Fig. 6, respectively.

478

## 479 **Gene prediction**

480 To identify the regions of genomic DNA that encode genes, we first estimated the portion of  
481 d'Anjou meta-assembly comprised of repetitive elements suitable for repeat masking prior to  
482 protein-coding gene annotation following the protocol described by Campbell *et al* (2014)<sup>100</sup>.  
483 The meta-assembly was first searched using MITE-Hunter<sup>101</sup> and LTRharvest/ LTRdigest<sup>102,103</sup>  
484 to collect consensus miniature inverted-repeat transposable elements (MITEs) and long terminal  
485 repeat retrotransposons (LTRs) respectively. LTRs were filtered to remove false positives and  
486 elements with nested insertions and used together with the MITEs to mask the genomes. The  
487 unmasked regions of the genomes were then annotated with RepeatModeler  
488 (<http://www.repeatmasker.org/RepeatModeler>) to predict additional *de novo* repetitive  
489 sequences. All collected repetitive sequences were compared to a BLAST database of plant  
490 proteins from SwissProt and RefSeq, and sequences with significant hits were excluded from the  
491 repeat masking library.

492  
493 Extensive extrinsic gene annotation homology evidence from RNA-seq and protein were  
494 collected to supplement *ab initio* gene predictions. RNA-Seq evidence included Trinity<sup>104</sup> *de*  
495 *novo* reconstructed transcripts from d'Anjou pear fruit peel and cortex tissues sampled at multiple  
496 time points described in our previous study<sup>32</sup>. Protein homology evidence of closely related  
497 species were collected from the Genome Database for Rosaceae (GDR), including *Malus*  
498 *domestica*, *Prunus persica*, *Pyrus betulifolia*, *Pyrus communis* 'Bartlett', *Pyrus x bretschneideri*,  
499 *Rosa chinensis*, and *Rubus occidentalis*<sup>105</sup>. The plant model species, *Arabidopsis thaliana*<sup>106</sup>, was  
500 included as well.

501

502 Protein-coding gene annotations from the *Pyrus communis* reference genomes of Bartlett\_v1 and  
503 Bartlett.DH\_v2 were separately transferred (liftovers) to pseudomolecules of d'Anjou meta-  
504 assembly using the FLO (<https://github.com/wurmlab/flo>) pipeline based on the UCSC Genome  
505 Browser Kent-Toolkit<sup>107</sup>. Next, the MAKER annotation pipeline (release 3.01.02)<sup>108</sup> was used to  
506 update the transferred annotations with evidence data and gene models predicted by *ab initio*  
507 gene finders. Repetitive and low complexity regions of the pseudomolecules were first masked  
508 with RepeatMasker in MAKER using the previously described d'Anjou-specific repeat library.  
509 MAKER updated transferred annotations with evidence data and predicted additional annotations  
510 with Augustus<sup>109,110</sup> and SNAP<sup>111</sup> using the d'Anjou training set where evidence suggests a gene.  
511 Only predicted gene models supported by annotation evidence, encode a Pfam domain, or both,  
512 were retained.

513

#### 514 **Computation of pear orthogroups**

515 To compare the gene content of the two *Pyrus communis* cultivars, 'Bartlett' and 'd'Anjou',  
516 orthologous and paralogous gene clusters of Bartlett\_v1, Bartlett.DH\_v2, and d'Anjou were  
517 estimated with OrthoFinder version 1.1.5<sup>112</sup> for annotated proteins in all the genomes.

518

#### 519 **Bartlett.DH\_v2 genome polishing**

520 To improve the base quality of the publicly available pear reference genome, the *Pyrus*  
521 *communis* 'Bartlett.DH\_v2' assembly was iteratively polished with two rounds of Pilon (v1.24)<sup>95</sup>  
522 using the raw Illumina shotgun reads from the Bartlett.DH\_v2 genome projects obtained from  
523 the NCBI Short Read Archive (SRA accessions: SRR10030340, SRR10030308), and  
524 completeness and accuracy assessed with the BUSCO<sup>30</sup> embryophyta\_odb10 database.

525

## 526 **Gene family identification**

527 Coding sequences of candidate genes and their corresponding peptides gleaned from published  
528 literature were sorted into pre-computed orthologous gene family clusters of representative 26  
529 genomes from land plants using the both BLASTp<sup>113</sup> and HMMER hmmscan<sup>114</sup> sequence search  
530 option of the *GeneFamilyClassifier* tool implemented in the PlantTribes gene family analysis  
531 pipeline (<https://github.com/dePamphilis/PlantTribes>). Classification results, including  
532 orthogroup taxa gene counts, corresponding superclusters (super orthogroups) at multiple  
533 clustering stringencies, and orthogroup-level annotations from multiple public biological  
534 functional databases are reported in Supplementary Table 5.

535

## 536 **Gene family analysis**

537 All the tools used in this process are modules from the command line version of PlantTribes  
538 software and are processed on SCINet (<https://scinet.usda.gov/>) with customized scripts. Protein  
539 coding genes from 14 Rosaceae species (*Fragaria vesca* v2.0.a2<sup>115</sup>, *Rosa chinensis* old Blush  
540 homozygous v2.0<sup>116</sup>, *Rubus occidentalis* v3.0<sup>117</sup>, *Prunus avium* v1.0.a1<sup>118</sup>, *Malus domestica*  
541 HFTH v1.0<sup>13</sup>, *M. domestica* GDDH13 v1.1<sup>15</sup>, *M. domestica* Gala v1.0<sup>14</sup>, *M. sieversii* v1.0<sup>14</sup>, *M.*  
542 *sylvestris* v1.0<sup>14</sup>, *Pyrus communis* v1.0<sup>18</sup>, *Pyrus communis* Bartlett DH v2.0<sup>17</sup>, *Pyrus ussuriensis*  
543 *x communis* v1.0<sup>119</sup>, *Pyrus bretschneideri* v1.1<sup>120</sup>, *Pyrus communis* d'Anjou v0.1) were sorted  
544 into orthologous groups with the *GeneFamilyClassifier* as previously described. For species  
545 lacking matching coding sequence file and peptide file, transcripts were processed to predict  
546 potential protein coding regions using the TransDecoder<sup>121</sup> option of *AssemblyPostProcessor*. A  
547 detailed summary of the Rosaceae gene family classification results are in Supplementary Table



548 3. Sequences classified into the orthogroups of interest (with candidate genes in this study) were  
549 integrated with scaffold backbone gene models using the *GeneFamilyIntegrator* tool. Gene  
550 names were modified as shown in Supplementary Table 9 for easier recognition of the species.  
551 Amino acid multiple sequence alignments and their corresponding DNA codon alignments were  
552 generated by *GeneFamilyAligner* with the L-INS-i algorithm implemented in MAFFT<sup>122</sup>. Sites  
553 present in less than 10% of the aligned DNA sequences were removed with trimAL<sup>123</sup>.  
554 Maximum likelihood (ML) phylogenetic trees were estimated from the trimmed DNA  
555 alignments using the RAxML algorithm<sup>124</sup> option in the *GeneFamilyPhylogenyBuilder*. One  
556 hundred bootstrap replicates (unless otherwise indicated) were conducted for each tree to  
557 estimate the reliability of the branches. The multiple sequence alignments were visualized in the  
558 Geneious R9 software<sup>125</sup> with Clustal color scheme. The phylogeny was colored with a custom  
559 script and visualized with Dendroscope (version 3.7.5)<sup>126</sup>. Gene sequences, alignments, and  
560 phylogenies are available in Supplementary File 1-3.

561

### 562 **Domain prediction**

563 To estimate domain structures of proteins in each orthogroup, the predicted amino acid  
564 sequences (either obtained from public databases or generated by the PlantTribes  
565 *AssemblyPostProcessor* tool) were submitted to interproscan (version 5.44-79.0)<sup>127,128</sup> on SCINet  
566 and searched against all the databases.

567

### 568 **Targeted gene family annotation**

569 The following approaches were used in parallel to annotate candidate genes from the original  
570 Bartlett.DH\_v2, polished Bartlett.DH\_v2, and the d'Anjou genome assemblies:

571

572 *TGFam-finder*<sup>67</sup>

573 The ‘RESOURCE.config’ and ‘PROGRAM\_PATH.config’ files were generated according to the  
574 author’s instruction. The two Bartlett.DH\_v2 genome assemblies and the d’Anjou\_v1 genome  
575 were used as the *target genomes*. Complete protein sequences from apples and pears in the same  
576 orthogroup were used as *protein for domain identification*. Complete protein sequences from  
577 other Rosaceae species and *Arabidopsis thaliana* in the same orthogroup were used as *resource*  
578 *proteins* for each annotation step. For each orthogroup, Pfam annotations from the InterProScan  
579 results were used as *TSV for domain identification*. For orthogroups without Pfam descriptions,  
580 MobiDBLite information was used as *TSV for domain identification*.

581

582 *Bitacora*<sup>66</sup>

583 Arabidopsis genes from targeted gene families (orthogroups of interest) were used to generate a  
584 multiple sequence alignment and HMM profile using MAFFT<sup>122</sup> and hmmbuild. The resulting  
585 files were then used as input for Bitacora v1.3, running in both genome mode and full mode to  
586 identify genes of interest in the original Bartlett.DH\_v2 genome.

587

### 588 **Manual curation and gene model verification**

589 In cases where both TGFam-Finder and Bitacora failed to predict a full-length gene, the gene  
590 model was curated manually.

591

592 *Curation with orthologous gene models*

593 First, the genomic region containing the target sequence was determined either by the general  
594 feature format file (gff) or a BLASTn search using the coding sequence of the target gene or a  
595 closely related gene as a query. Next, a genomic fragment containing the target sequence and  
596 3kb upstream and downstream of the targeted region was extracted. Then, the incomplete  
597 transcript(s), predicted exons, and complete gene models from a closely related species were  
598 mapped to the extracted genomic region. The final gene model was determined by using the full-  
599 length coding sequence of a closely related gene as a reference.

600

#### 601 *Curation with RNA-seq read mapping*

602 The gff3 files obtained from Bitacora were loaded into an Apollo docker container (v2.6.3)<sup>129</sup> for  
603 verification of the predicted gene models using expression data. Publicly available RNA-seq  
604 data<sup>68-73</sup> for *Pyrus* were used as inputs of an RNA-seq aligner, STAR (v2.7.8a)<sup>130</sup>, and  
605 alignments were performed with maximum intron size set to 5kb and default settings. Intron-  
606 exon structure was compared to the aligned expression data. If there was insufficient RNA-seq  
607 coverage from the targeted cultivar, data from other cultivars and *Pyrus* species were used as  
608 supporting evidence. Read mapping results are available in Supplementary File 4-5. Curated  
609 gene models from the original Bartlett.DH\_v2 were transferred to the polished genome for  
610 validation.

611

612 Gene model cartoons were generated using the visualize gene structure function in TBtools  
613 (v1.09854)<sup>131</sup>. Final gene models and their corresponding chromosomal locations are available in  
614 Supplementary File 6-7.

615

616 **Data Availability**

617 Raw read data of d'Anjou genome sequencing has been deposited at NCBI SRA under  
618 Bioproject ID PRJNA762155. Genome assembly and gene prediction of the draft 'd'Anjou'  
619 genome, and the polished 'Bartlett.DH\_v2' genome assembly have been submitted to the  
620 Genome Database for Rosacea (GDR). Supplementary information accompanies the manuscript  
621 on the BioRxiv.

622

623 **Acknowledgements**

624 This work was supported by the Washington Tree Fruit Research Commission project PR-17-  
625 104 and the Agricultural Research Service in the US Department of Agriculture. The authors  
626 would like to acknowledge Heidi Hargarten for maintaining the d'Anjou plant and collecting leaf  
627 tissue for sequencing. They also thank Craig Praul at Penn State and Diana Burkart-Waco and  
628 Lutz Froenicke at UC Davis for sequencing.

629

630 **Conflict of interests**

631 The authors declare no conflict of interests.

632

633 **Author Contributions**

634 HZ, JW, LH conceived and designed the research. PR prepared gDNA for sequencing. HZ, EW,  
635 PT, JE, JW, and AH performed the genome assembly and gene family analysis. All authors  
636 participated in writing and revising the manuscript.

637

638 **References**

- 639 1 Chen, J. *et al.* A chromosome-scale genome sequence of pitaya (*Hylocereus undatus*) provides  
640 novel insights into the genome evolution and regulation of betalain biosynthesis. *Hortic Res.* **8**,  
641 164 (2021).
- 642 2 Wang, J. *et al.* A high-quality genome assembly of *Morinda officinalis*, a famous native  
643 southern herb in the Lingnan region of southern China. *Hortic Res.* **8**, 135 (2021).
- 644 3 Huang, Y. *et al.* Genome of a citrus rootstock and global DNA demethylation caused by  
645 heterografting. *Hortic Res.* **8**, 69 (2021).
- 646 4 Chen, D. *et al.* The chromosome-level reference genome of *Coptis chinensis* provides insights  
647 into genomic evolution and berberine biosynthesis. *Hortic Res.* **8**: 121 (2021).
- 648 5 Xu, X. *et al.* The chromosome-level *Stevia* genome provides insights into steviol glycoside  
649 biosynthesis. *Hortic Res.* **8**: 129 (2021).
- 650 6 Wang, P. *et al.* Genetic basis of high aroma and stress tolerance in the oolong tea cultivar  
651 genome. *Hortic Res.* **8**: 107 (2021).
- 652 7 Hill, J. L. & Hollender, C. A. Branching out: new insights into the genetic regulation of shoot  
653 architecture in trees. *Curr Opin Plant Biol.* **47**: 73–80 (2019).
- 654 8 Stansell, Z. & Björkman, T. From landrace to modern hybrid broccoli: the genomic and  
655 morphological domestication syndrome within a diverse *B. oleracea* collection. *Hortic Res.* **7**:  
656 159 (2020).
- 657 9 Stansell, Z. *et al.* Genotyping-by-sequencing of *Brassica oleracea* vegetables reveals unique  
658 phylogenetic patterns, population structure and domestication footprints. *Hortic Res.* **5**: 38  
659 (2018).
- 660 10 Cheng, F. *et al.* Subgenome parallel selection is associated with morphotype diversification

- 661 and convergent crop domestication in *Brassica rapa* and *Brassica oleracea*. *Nat Genet.* **48**:  
662 1218–1224 (2016).
- 663 11 Mabry, M. E. *et al.* The evolutionary history of wild, domesticated, and feral *Brassica*  
664 *Oleracea* (Brassicaceae). *Mol Biol Evol.* doi:10.1093/molbev/msab183 (2021).
- 665 12 Cheng, F. *et al.* Genome resequencing and comparative variome analysis in a *Brassica rapa*  
666 and *Brassica oleracea* collection. *Sci Data.* **3**: 160119 (2016).
- 667 13 Zhang, L. *et al.* A high-quality apple genome assembly reveals the association of a  
668 retrotransposon and red fruit colour. *Nat Commun.* **10**: 1494 (2019).
- 669 14 Sun, X. *et al.* Phased diploid genome assemblies and pan-genomes provide insights into the  
670 genetic history of apple domestication. *Nat Genet.* **52**: 1423–1432 (2020).
- 671 15 Daccord, N. *et al.* High-quality *de novo* assembly of the apple genome and methylome  
672 dynamics of early fruit development. *Nat Genet.* **49**: 1099–1106 (2017).
- 673 16 Velasco, R. *et al.* The genome of the domesticated apple (*Malus × domestica* Borkh.). *Nat*  
674 *Genet.* **42**: 833–839 (2010).
- 675 17 Linsmith, G. *et al.* Pseudo-chromosome-length genome assembly of a double haploid  
676 “Bartlett” pear (*Pyrus communis* L.). *Gigascience.* **8**. doi:10.1093/gigascience/giz138 (2019).
- 677 18 Chagné, D. *et al.* The draft genome sequence of European pear (*Pyrus communis* L.  
678 ‘Bartlett’). *Plos One.* **9**: e92644 (2014).
- 679 19 Wu, J. *et al.* A naturally occurring InDel variation in *BraA.FLC.b* (*BrFLC2*) associated with  
680 flowering time variation in *Brassica rapa*. *Bmc Plant Biol.* **12**: 151 (2012).
- 681 20 Tollenaere, R. *et al.* Identification and characterization of candidate *Rlm4* blackleg resistance  
682 genes in *Brassica napus* using next-generation sequencing. *Plant Biotechnol J.* **10**: 709–715  
683 (2012).

- 684 21 Takos, A. M. *et al.* Light-Induced Expression of a *MYB* Gene Regulates Anthocyanin  
685 Biosynthesis in Red Apples. *Plant Physiology* **142**: 1216–1232 (2006).
- 686 22 Pertea, M. *et al.* CHESS: a new human gene catalog curated from thousands of large-scale  
687 RNA sequencing experiments reveals extensive transcriptional noise. *Genome Biol* **19**: 208  
688 (2018).
- 689 23 Pilkington, S. M. *et al.* A manually annotated *Actinidia chinensis* var. *chinensis* (kiwifruit)  
690 genome highlights the challenges associated with draft genomes and gene prediction in plants.  
691 *Bmc Genomics* **19**: 257 (2018).
- 692 24 Marx, H. *et al.* A proteomic atlas of the legume *Medicago truncatula* and its nitrogen-fixing  
693 endosymbiont *Sinorhizobium meliloti*. *Nat Biotechnol.* **34**: 1198–1205 (2016).
- 694 25 Kyriakidou, M., Tai, H. H., Anglin, N. L., Ellis, D., & Strömvik, M. V. Current strategies of  
695 polyploid plant genome sequence assembly. *Front Plant Sci.* **9**: 1660 (2018).
- 696 26 Hughes, T. E., Langdale, J. A., & Kelly, S. The impact of widespread regulatory  
697 neofunctionalization on homeolog gene evolution following whole-genome duplication in maize.  
698 *Genome Res.* **24**: 1348–1355 (2014).
- 699 27 Yoshida, S. *et al.* Genome sequence of *Striga asiatica* provides insight into the evolution of  
700 plant parasitism. *Curr Biol.* **29**: 3041-3052.e4 (2019).
- 701 28 Yang, Z. *et al.* Comparative transcriptome analyses reveal core parasitism genes and suggest  
702 gene duplication and repurposing as sources of structural novelty. *Mol Biol Evol.* **32**: 767–790  
703 (2015).
- 704 29 Xiao, D. *et al.* The *Brassica rapa* *FLC* homologue *FLC2* is a key regulator of flowering time,  
705 identified through transcriptional co-expression networks. *J Exp Bot.* **64**: 4503–4516 (2013).
- 706 30 Manni, M., Berkeley, M. R., Seppey, M., Simão, F. A., & Zdobnov, E. M. BUSCO update:

707 novel and streamlined workflows along with broader and deeper phylogenetic coverage for  
708 scoring of eukaryotic, prokaryotic, and viral genomes. *Mol Biol Evol.* msab199- (2021).

709 31 Mistry, J. *et al.* Pfam: The protein families database in 2021. *Nucleic Acids Res.* **49**: gkaa913-  
710 (2020).

711 32 Honaas, L. *et al.* Transcriptomics of differential ripening in ‘d’Anjou’ pear (*Pyrus communis*  
712 L.). *Front Plant Sci.* **12**: 609684 (2021).

713 33 Kwon, M. & Choe, S. Brassinosteroid biosynthesis and dwarf mutants. *J Plant Biol.* **48**: 1  
714 (2004).

715 34 Waite, J. M. & Dardick, C. The roles of the *IGT* gene family in plant architecture: past,  
716 present, and future. *Curr Opin Plant Biol.* **59**: 101983 (2021).

717 35 Bulley, S. M. *et al.* Modification of gibberellin biosynthesis in the grafted apple scion allows  
718 control of tree height independent of the rootstock. *Plant Biotechnol J.* **3**: 215–223 (2005).

719 36 Griffiths, J. *et al.* Genetic Characterization and Functional Analysis of the *GIDI* Gibberellin  
720 Receptors in Arabidopsis. *Plant Cell Online* **18**: 3399–3414 (2006).

721 37 Dugardeyn, J. & Straeten, D. V. D. Ethylene: Fine-tuning plant growth and development by  
722 stimulation and inhibition of elongation. *Plant Sci.* **175**: 59–70 (2008).

723 38 Křeček, P. *et al.* The PIN-FORMED (PIN) protein family of auxin transporters. *Genome*  
724 *Biol.* **10**: 249 (2009).

725 39 Martín-Rejano, E. M. *et al.* Auxin and ethylene are involved in the responses of root system  
726 architecture to low boron supply in Arabidopsis seedlings. *Physiol Plantarum.* **142**: 170–178  
727 (2011).

728 40 Li, H. L. *et al.* Possible roles of auxin and zeatin for initiating the dwarfing effect of M9 used  
729 as apple rootstock or interstock. *Acta Physiol Plant.* **34**: 235–244 (2012).



- 730 41 Chang, L., Ramireddy, E., & Schmülling, T. Lateral root formation and growth of  
731 Arabidopsis is redundantly regulated by cytokinin metabolism and signalling genes. *J Exp Bot.*  
732 **64**: 5021–5032 (2013).
- 733 42 Dardick, C. *et al.* *PpeTAC1* promotes the horizontal growth of branches in peach trees and is  
734 a member of a functionally conserved gene family found in diverse plants species. *Plant J.* **75**:  
735 618–630 (2013).
- 736 43 Tworkoski, T., Webb, K., & Callahan, A. Auxin levels and *MAX1-4* and *TAC1* gene  
737 expression in different growth habits of peach. *Plant Growth Regul.* **77**: 279–288 (2015).
- 738 44 Hollender, C. A., Hadiarto, T., Srinivasan, C., Scorza, R., & Dardick, C. A brachytic  
739 dwarfism trait (*dw*) in peach trees is caused by a nonsense mutation within the gibberellic acid  
740 receptor *PpeGID1c*. *New Phytol.* **210**: 227–239 (2016).
- 741 45 Ma, Y. *et al.* Involvement of auxin and brassinosteroid in dwarfism of autotetraploid apple  
742 (*Malus × domestica*). *Sci Rep-uk.* **6**: 26719 (2016).
- 743 46 Li, G. *et al.* Transcriptome analysis reveals the effects of sugar metabolism and auxin and  
744 cytokinin signaling pathways on root growth and development of grafted apple. *Bmc Genomics.*  
745 **17**: 150 (2016).
- 746 47 Foster, T. M., McAtee, P. A., Waite, C. N., Boldingh, H. L., & McGhie, T. K. Apple  
747 dwarfing rootstocks exhibit an imbalance in carbohydrate allocation and reduced cell growth and  
748 metabolism. *Hortic Res.* **4**: 17009 (2017).
- 749 48 Harrison C. J. Auxin transport in the evolution of branching forms. *New Phytol.* **215**: 545–  
750 551 (2017).
- 751 49 Guseman, J. M., Webb, K., Srinivasan, C., & Dardick, C. *DRO1* influences root system  
752 architecture in Arabidopsis and *Prunus* species. *Plant J.* **89**: 1093–1105 (2017).

- 753 50 An, H. *et al.* Dwarfing effect of apple rootstocks is intimately associated with low number of  
754 fine roots. *Hortscience*. **52**: 503–512 (2017).
- 755 51 An, J. *et al.* Molecular cloning and functional characterization of *MdPIN1* in apple. *J Integr*  
756 *Agr*. **16**: 1103–1111 (2017).
- 757 52 Zheng, L. *et al.* Genome-wide identification and expression analysis of brassinosteroid  
758 biosynthesis and metabolism genes regulating apple tree shoot and lateral root growth. *J Plant*  
759 *Physiol*. **231**: 68–85 (2018).
- 760 53 Gan, Z. *et al.* *MdPIN1b* encodes a putative auxin efflux carrier and has different expression  
761 patterns in BC and M9 apple rootstocks. *Plant Mol Biol*. **96**: 353–365 (2018).
- 762 54 Zheng, X. *et al.* *MdWRKY9* overexpression confers intensive dwarfing in the M26 rootstock  
763 of apple by directly inhibiting brassinosteroid synthetase *MdDWF4* expression. *New Phytol*. **217**:  
764 1086–1098 (2018).
- 765 55 Wang, L. *et al.* The isolation of the *IGT* family genes in *Malus × domestica* and their  
766 expressions in four idiotypic apple cultivars. *Tree Genet Genomes*. **14**: 46 (2018).
- 767 56 Cheng, J. *et al.* A single nucleotide mutation in *GID1c* disrupts its interaction with *DELLA1*  
768 and causes a GA-insensitive dwarf phenotype in peach. *Plant Biotechnol J*. **17**: 1723–1735  
769 (2019).
- 770 57 Li, C. *et al.* Comprehensive expression analysis of Arabidopsis *GA2-oxidase* genes and their  
771 functional insights. *Plant Sci*. **285**: 1–13 (2019).
- 772 58 Zheng, X., Zhang, H., Xiao, Y., Wang, C., & Tian, Y. Deletion in the promoter of *PcPIN-L*  
773 affects the polar auxin transport in dwarf pear (*Pyrus communis* L.). *Sci Rep-uk*. **9**: 18645 (2019).
- 774 59 Swarup, R. & Bhosale, R. Developmental roles of *AUX1/LAX* auxin influx carriers in plants.  
775 *Front Plant Sci*. **10**: 1306 (2019).

- 776 60 Tan, M. *et al.* Role of cytokinin, strigolactone, and auxin export on outgrowth of axillary  
777 buds in apple. *Front Plant Sci.* **10**: 616 (2019).
- 778 61 Qi, L. *et al.* Characterization of the auxin efflux transporter PIN proteins in pear. *Plants.* **9**:  
779 349 (2020).
- 780 62 Sun, X. *et al.* Genes involved in strigolactone biosyntheses and their expression analyses in  
781 columnar apple and standard apple. *Biol Plantarum.* **64**: 68–76 (2020).
- 782 63 Cheng, J. *et al.* Functional analysis of the *Gibberellin 2-oxidase* gene family in peach. *Front*  
783 *Plant Sci.* **12**: 619158 (2021).
- 784 64 Pandey, B. K. *et al.* Plant roots sense soil compaction through restricted ethylene diffusion.  
785 *Science* **371**: 276–280 (2021).
- 786 65 Wafula E. K. Computational methods for comparative genomics of non-model species: A  
787 case study in the parasitic plant family Orobanchaceae. (The Pennsylvania State University, State  
788 College, PA, USA, 2019).
- 789 66 Vizuetta, J., Sánchez-Gracia, A., & Rozas, J. bitacora: A comprehensive tool for the  
790 identification and annotation of gene families in genome assemblies. *Mol Ecol Resour.* **20**:  
791 1445–1452 (2020).
- 792 67 Kim, S. *et al.* TGFamFinder: a novel solution for target gene family annotation in plants.  
793 *New Phytol.* **227**: 1568–1581 (2020).
- 794 68 Nham, N. T. *et al.* A transcriptome approach towards understanding the development of  
795 ripening capacity in ‘Bartlett’ pears (*Pyrus communis* L.). *Bmc Genomics.* **16**: 762 (2015).
- 796 69 Hewitt, S. L., Hendrickson, C. A., & Dhingra, A. Evidence for the involvement of  
797 vernalization-related genes in the regulation of cold-induced ripening in ‘d’Anjou’ and ‘Bartlett’  
798 pear fruit. *Sci Rep-uk.* **10**: 8478 (2020).

799 70 Gabay, G. *et al.* Transcriptome analysis and metabolic profiling reveal the key role of  $\alpha$ -  
800 linolenic acid in dormancy regulation of European pear. *J Exp Bot.* **70**: ery405 (2018).

801 71 Zhang, Z. *et al.* Transcriptomic and metabolomic analysis provides insights into anthocyanin  
802 and procyanidin accumulation in pear. *Bmc Plant Biol.* **20**: 129 (2020).

803 72 Nham, N. T., Macnish, A. J., Zakharov, F., & Mitcham, E. J. ‘Bartlett’ pear fruit (*Pyrus*  
804 *communis* L.) ripening regulation by low temperatures involves genes associated with jasmonic  
805 acid, cold response, and transcription factors. *Plant Sci.* **260**: 8–18 (2017).

806 73 Zhang, H. *et al.* RNA-Seq analysis of the tissue-specific expressed genes of *Pyrus*  
807 *betulaefolia* in root, stem and leaf. *Acta Horticulturae Sinica.* **45**: 1881–1894 (2018).

808 74 Yoshihara, T., Spalding, E. P., & Iino, M. *AtLAZY1* is a signaling component required for  
809 gravitropism of the *Arabidopsis thaliana* inflorescence. *Plant J.* **74**: 267–279 (2013).

810 75 Yoshihara, T., & Spalding, E. P. *LAZY* genes mediate the effects of gravity on auxin  
811 gradients and plant architecture. *Plant Physiol.* **175**: 959–969 (2017).

812 76 Li, P. *et al.* *LAZY1* controls rice shoot gravitropism through regulating polar auxin transport.  
813 *Cell Res.* **17**: 402–410 (2007).

814 77 Yu, B. *et al.* *TAC1*, a major quantitative trait locus controlling tiller angle in rice. *Plant J.* **52**:  
815 891–898 (2007).

816 78 Uga, Y. *et al.* Control of root system architecture by *DEEPER ROOTING 1* increases rice  
817 yield under drought conditions. *Nat Genet.* **45**: 1097–1102 (2013).

818 79 Mount, S. M. Genomic sequence, splicing, and gene annotation. *Am J Hum Genetics.* **67**:  
819 788–792 (2000).

820 80 Guo, L., & Liu, C-M. A single-nucleotide exon found in *Arabidopsis*. *Sci Rep-uk.* **5**: 18087  
821 (2015).

- 822 81 Sharma, S., Sharma, S. N., & Saxena, R. Identification of short exons disunited by a short  
823 intron in eukaryotic DNA regions. *Ieee Acm Transactions Comput Biology Bioinform.* **17**: 1660–  
824 1670 (2018).
- 825 82 Zheng, X., Xiao, Y., Tian, Y., Yang, S., & Wang, C. *PcDWF1*, a pear brassinosteroid  
826 biosynthetic gene homologous to *AtDWARF1*, affected the vegetative and reproductive growth of  
827 plants. *Bmc Plant Biol.* **20**: 109 (2020).
- 828 83 Cancino-García, V. J., Ramírez-Prado, J. H., & De-la-Peña, C. Auxin perception in *Agave* is  
829 dependent on the species' Auxin Response Factors. *Sci Rep-uk.* **10**: 3860 (2020).
- 830 84 Feng, Y. *et al.* Genome-wide identification and characterization of ABC transporters in nine  
831 Rosaceae species identifying *MdABCG28* as a possible cytokinin transporter linked to dwarfing.  
832 *Int J Mol Sci.* **20**: 5783 (2019).
- 833 85 Wall, P. K. *et al.* PlantTribes: a gene and gene family resource for comparative genomics in  
834 plants. *Nucleic Acids Res.* **36**: D970–D976 (2008).
- 835 86 Harper, L. *et al.* AgBioData consortium recommendations for sustainable genomics and  
836 genetics databases for agriculture. *Database.* **2018**: 1–32 (2018).
- 837 87 Michiels, A., Ende, W. V. den., Tucker, M., Riet, L. V., & Laere, A. V. Extraction of high-  
838 quality genomic DNA from latex-containing plants. *Anal Biochem.* **315**: 85–89 (2003).
- 839 88 Koren, S. *et al.* Canu: scalable and accurate long-read assembly via adaptive k-mer weighting  
840 and repeat separation. *Genome Res.* **27**: 722–736 (2017).
- 841 89 Zimin, A. V. *et al.* The MaSuRCA genome assembler. *Bioinformatics.* **29**: 2669–2677  
842 (2013).
- 843 90 Weisenfeld, N. I., Kumar, V., Shah, P., Church, D. M., & Jaffe, D. B. Direct determination of  
844 diploid genome sequences. *Genome Res.* **27**: 757–767 (2017).

- 845 91 Chakraborty, M., Baldwin-Brown, J. G., Long, A. D., & Emerson, J. J. Contiguous and  
846 accurate *de novo* assembly of metazoan genomes with modest long read coverage. *Nucleic Acids*  
847 *Res.* **44**: e147–e147 (2016).
- 848 92 Jackman, S. D. *et al.* Tigmint: correcting assembly errors using linked reads from large  
849 molecules. *Bmc Bioinformatics.* **19**: 393 (2018).
- 850 93 Yeo, S., Coombe, L., Warren, R. L., Chu, J., & Birol, I. ARCS: scaffolding genome drafts  
851 with linked reads. *Bioinformatics.* **34**: 725–731 (2017).
- 852 94 Boetzer, M. & Pirovano, W. Toward almost closed genomes with GapFiller. *Genome Biol.*  
853 **13**: R56 (2012).
- 854 95 Walker, B. J. *et al.* Pilon: An integrated tool for comprehensive microbial variant detection  
855 and genome assembly improvement. *Plos One.* **9**: e112963 (2014).
- 856 96 Hämälä, T. *et al.* Genomic structural variants constrain and facilitate adaptation in natural  
857 populations of *Theobroma cacao*, the chocolate tree. *PNAS.* doi:10.1073/pnas.2102914118  
858 (2021).
- 859 97 Alonge, M. *et al.* RaGOO: fast and accurate reference-guided scaffolding of draft genomes.  
860 *Genome Biol.* **20**: 224 (2019).
- 861 98 Cabanettes, F. & Klopp, C. D-GENIES: dot plot large genomes in an interactive, efficient  
862 and simple way. *Peerj.* **6**: e4958 (2018).
- 863 99 Li H. Minimap and miniasm: fast mapping and *de novo* assembly for noisy long sequences.  
864 *Bioinformatics.* **32**: 2103–2110 (2016).
- 865 100 Campbell, M. S., Holt, C., Moore, B., & Yandell, M. Genome annotation and curation using  
866 MAKER and MAKER-P. *Curr Protoc Bioinform.* **48**: 4.11.1-4.11.39 (2014).
- 867 101 Han, Y. & Wessler, S. R. MITE-Hunter: a program for discovering miniature inverted-

868 repeat transposable elements from genomic sequences. *Nucleic Acids Res.* **38**: e199–e199 (2010).

869 102 Ellinghaus, D., Kurtz, S., & Willhoeft, U. LTRharvest, an efficient and flexible software for  
870 *de novo* detection of LTR retrotransposons. *Bmc Bioinformatics.* **9**: 18 (2008).

871 103 Steinbiss, S., Willhoeft, U., Gremme, G., & Kurtz, S. Fine-grained annotation and  
872 classification of *de novo* predicted LTR retrotransposons. *Nucleic Acids Res.* **37**: 7002–7013  
873 (2009).

874 104 Grabherr, M. G. *et al.* Full-length transcriptome assembly from RNA-Seq data without a  
875 reference genome. *Nat Biotechnol.* **29**: 644–652 (2011).

876 105 Jung, S. *et al.* 15 years of GDR: New data and functionality in the Genome Database for  
877 Rosaceae. *Nucleic Acids Res.* **47**: D1137–D1145 (2018).

878 106 Cheng, C. *et al.* Araport11: a complete reannotation of the *Arabidopsis thaliana* reference  
879 genome. *Plant J.* **89**: 789–804 (2017).

880 107 Kuhn, R. M., Haussler, D., & Kent, W. J. The UCSC genome browser and associated tools.  
881 *Brief Bioinform.* **14**: 144–161 (2013).

882 108 Cantarel, B. L. *et al.* MAKER: An easy-to-use annotation pipeline designed for emerging  
883 model organism genomes. *Genome Res.* **18**: 188–196 (2008).

884 109 Stanke, M., Steinkamp, R., Waack, S., & Morgenstern, B. AUGUSTUS: a web server for  
885 gene finding in eukaryotes. *Nucleic Acids Res.* **32**: W309–W312 (2004).

886 110 Hoff, K. J. & Stanke, M. Predicting genes in single genomes with AUGUSTUS. *Curr*  
887 *Protoc Bioinform.* **65**: e57 (2019).

888 111 Korf, I. Gene finding in novel genomes. *Bmc Bioinformatics.* **5**: 59 (2004).

889 112 Emms, D. M. & Kelly, S. OrthoFinder: phylogenetic orthology inference for comparative  
890 genomics. *Genome Biol.* **20**: 238 (2019).

- 891 113 Camacho, C. *et al.* BLAST+: architecture and applications. *Bmc Bioinformatics*. **10**: 421  
892 (2009).
- 893 114 Eddy, S. R. Accelerated Profile HMM Searches. *Plos Comput Biol*. **7**: e1002195 (2011).
- 894 115 Li, Y. *et al.* Genome re-annotation of the wild strawberry *Fragaria vesca* using extensive  
895 Illumina- and SMRT-based RNA-seq datasets. *Dna Res*. **25**: dsx038 (2017).
- 896 116 Raymond, O. *et al.* The *Rosa* genome provides new insights into the domestication of  
897 modern roses. *Nat Genet*. **50**: 772–777 (2018).
- 898 117 VanBuren, R. *et al.* A near complete, chromosome-scale assembly of the black raspberry  
899 (*Rubus occidentalis*) genome. *Gigascience*. **7**: giy094- (2018).
- 900 118 Shirasawa, K. *et al.* The genome sequence of sweet cherry (*Prunus avium*) for use in  
901 genomics-assisted breeding. *Dna Res*. **24**: dsx020- (2017).
- 902 119 Ou, C. *et al.* A *de novo* genome assembly of the dwarfing pear rootstock Zhongai 1. *Sci*  
903 *Data* **6**: 281 (2019).
- 904 120 Xue, H. *et al.* Chromosome level high-density integrated genetic maps improve the *Pyrus*  
905 *bretschneideri* ‘DangshanSuli’ v1.0 genome. *Bmc Genomics*. **19**: 833 (2018).
- 906 121 Haas, B. J. *et al.* *De novo* transcript sequence reconstruction from RNA-seq using the  
907 Trinity platform for reference generation and analysis. *Nat Protoc*. **8**: 1494-1512 (2013).
- 908 122 Katoh, K., Misawa, K., Kuma, K., & Miyata, T. MAFFT: a novel method for rapid multiple  
909 sequence alignment based on fast Fourier transform. *Nucleic Acids Res*. **30**: 3059–3066 (2002).
- 910 123 Capella-Gutiérrez, S., Silla-Martínez, J. M., & Gabaldón, T. trimAl: a tool for automated  
911 alignment trimming in large-scale phylogenetic analyses. *Bioinformatics*. **25**: 1972–1973 (2009).
- 912 124 Stamatakis, A. RAxML version 8: a tool for phylogenetic analysis and post-analysis of  
913 large phylogenies. *Bioinformatics*. **30**: 1312–1313 (2014).



- 914 125 Kears, M. *et al.* Geneious Basic: An integrated and extendable desktop software platform  
915 for the organization and analysis of sequence data. *Bioinformatics*. **28**: 1647–1649 (2012).
- 916 126 Huson, D. H., & Scornavacca, C. Dendroscope 3: An interactive tool for rooted  
917 phylogenetic trees and networks. *Systematic Biol.* **61**: 1061–1067 (2012).
- 918 127 Mulder, N. & Apweiler, R. Comparative Genomics. *Methods Mol Biology*. **396**: 59–70  
919 (2007).
- 920 128 Quevillon, E. *et al.* InterProScan: protein domains identifier. *Nucleic Acids Res.* **33**: W116–  
921 W120 (2005).
- 922 129 Dunn, N. A. *et al.* Apollo: Democratizing genome annotation. *Plos Comput Biol.* **15**:  
923 e1006790 (2019).
- 924 130 Dobin, A. *et al.* STAR: ultrafast universal RNA-seq aligner. *Bioinformatics*. **29**: 15–21  
925 (2013).
- 926 131 Chen, C. *et al.* TBtools: An integrative toolkit developed for interactive analyses of big  
927 biological data. *Mol Plant*. **13**: 1194–1202 (2020).

928 **Figure legends**

929 **Fig 1. Characterization of the d'Anjou\_v1 genome and protein orthology among European**

930 **pears. a.** Dot plot of genome alignment of Bartlett.DH\_v2 (x axis) and d'Anjou\_v1 (y axis). **b.**

931 Overlap and distinctiveness of gene annotations among three *Pyrus communis* genotypes,

932 Bartlett\_v1, Bartlett.DH\_v2, and d'Anjou.

933

934 **Fig 2. A workflow for candidate gene identification, curation, and gene family construction.**

935 Grey dotted boxes outlined the three steps of this workflow. Boxes with green outlines are input

936 information. Boxes with blue outlines are intermediate outputs and boxes with purple outlines

937 are final outputs. Contents in boxes with orange outlines are softwares used for generating the

938 outputs.

939

940 **Fig 3. Phylogeny, amino acid sequence comparison, and RNAseq read mapping of *PIN***

941 **genes. a.** One clade of short *PINs* from OG1145 phylogeny. *Malus* genes are indicated with a

942 blue background, *Pyrus* with a green background, and *Prunus* with a pink background. **b.** Amino

943 acid sequence alignment of orthologous genes from 10 Amygdaloideae species in the long *PIN*

944 gene family (OG438). Sites identical to the consensus are shown in grey and sites different from

945 the consensus are shown with a color following the Clustal color scheme in Geneious. Green

946 color in the identity row indicates 100% identical across all sequences and greeny-brown color

947 indicates identity from > 30% to < 100% identity. Gaps in the alignment are shown with a

948 straight line. **c.** RNAseq reads (forward: red; reverse: blue) mapped to a fragment of

949 chromosome 13 in the Bartlett.DH\_v2 genome, where a long *PIN* gene,

950 *Pyrco\_BartlettDH\_13g21160*, was annotated. Gene model in the yellow box is a putative gene

951 model predicted with RNAseq reads (ref. 73) mapped to this region. The two gene models above  
952 the read mapping are retrieved from the original annotations of Bartlett\_v1  
953 (*Pyrco\_Bartlett\_017869.1*) and Bartlett.DH\_v2 (*Pyrco\_BartlettDH\_13g21160*).

954

955 **Fig 4. Phylogeny, intron-exon structure, and amino acid comparison of IGT genes. a.**

956 Cladogram of the IGT gene family (including LAZY1-like, LAZY5-like, TAC1-like, and DRO-  
957 like). Genes are colored as shown in Supplementary Fig. 2. 1000 bootstrap replicates were  
958 conducted to estimate reliability and the numbers on the node indicate bootstrap support. **b.**

959 Cartoon illustrating intron-exon structures of IGT genes from *Arabidopsis thaliana* (Araport11),  
960 Bartlett.DH\_v2, and d'Anjou. **c.** Amino acid alignment of IGT genes from *Arabidopsis thaliana*,  
961 Bartlett.DH\_v2, and d'Anjou. Sites consisting of a similar amino acid type as the consensus were  
962 highlighted with a background color following the Clustal color scheme in Geneious. Red color  
963 in the identity row indicates identity < 30%. Five conserved regions were highlighted with a grey  
964 symbol below the consensus sequence.

965

966 **Tables**

967 **Table 1. Comparison of genome assembly and annotation, and orthogroups among *Pyrus communis***  
 968 **genotypes.**

969

| Characteristics                                      | Bartlett_v1 | Bartlett.DH_v2 | d'Anjou_v1 |
|------------------------------------------------------|-------------|----------------|------------|
| Assembly                                             |             |                |            |
| Assembly size (Mb)                                   | 600         | 507.7          | 600        |
| Number of scaffolds                                  | 142,083     | 592            | 5800       |
| Scaffold N50                                         | 88 Kb       | 8.1 Mb         | 358.88 Kb  |
| Pseudochromosomes                                    | 17          | 17             | 17         |
| Annotation                                           |             |                |            |
| Predicted gene number                                | 43,419      | 37,445         | 45,981     |
| BUSCO                                                | 96.5%       | 96.5%          | 96.6%      |
| Mean CDS length                                      | 1209        | 1120           | 1343       |
| Gene family classification                           |             |                |            |
| Percentage of genes classified into pear orthogroups | 76.2        | 76.2           | 80.4       |
| Percentage of pear orthogroups containing genes      | 93.7        | 81             | 90.7       |
| Number of 26Gv2 orthogroups containing genes         | 9878        | 9668           | 9837       |

970

971 **Table 2. Architecture gene family table**

| Family/<br>Gene | Species                             | Gene ID                                                                                 | Cultivar/Ecotype                                                                                    | Method                                                                                                  | Associated Architecture Phenotype                                                                                                                                                                     | Refs |
|-----------------|-------------------------------------|-----------------------------------------------------------------------------------------|-----------------------------------------------------------------------------------------------------|---------------------------------------------------------------------------------------------------------|-------------------------------------------------------------------------------------------------------------------------------------------------------------------------------------------------------|------|
| <b>PIN</b>      |                                     |                                                                                         |                                                                                                     |                                                                                                         |                                                                                                                                                                                                       |      |
| <b>PIN1</b>     | Apple<br>( <i>Malus domestica</i> ) | <i>MdPIN1</i> :<br><i>MDP0000138035</i><br>( <i>M. domestica</i><br>genome v1.0)        | Royal Gala                                                                                          | Overexpression of <i>Malus PIN1</i> gene in Arabidopsis                                                 | Inhibition of primary root elongation, increased lateral root number, enhanced phototropic and geotropism responses.                                                                                  | [51] |
|                 |                                     | <i>MdPIN1a</i> :<br><i>MF506847</i><br><i>MdPIN1b</i> :<br><i>MF506848</i><br>(Genbank) | <u>Rootstocks</u> :<br>Baleng Crab, M9;<br><u>Interstems</u> :<br>M9;<br><u>Scion</u> :<br>Red Fuji | Comparative gene expression between cultivars; subcellular localization; overexpression in tobacco; IAA | Lower <i>MdPIN1b</i> expression in bark of M9 dwarfing rootstock and interstem; longer lateral roots, more adventitious roots, shorter and fewer root hairs in <i>MdPIN1b</i> -overexpressing tobacco | [53] |

|                   |                                                                                   |                                                                                                                                                                                                                                                                                                                                                                     |                                                                                                                                        |                                                                                                                                                                |                                                                                                                                                                                                                                                                                                                          |      |
|-------------------|-----------------------------------------------------------------------------------|---------------------------------------------------------------------------------------------------------------------------------------------------------------------------------------------------------------------------------------------------------------------------------------------------------------------------------------------------------------------|----------------------------------------------------------------------------------------------------------------------------------------|----------------------------------------------------------------------------------------------------------------------------------------------------------------|--------------------------------------------------------------------------------------------------------------------------------------------------------------------------------------------------------------------------------------------------------------------------------------------------------------------------|------|
|                   |                                                                                   |                                                                                                                                                                                                                                                                                                                                                                     |                                                                                                                                        | quantification                                                                                                                                                 | lines.                                                                                                                                                                                                                                                                                                                   |      |
|                   | Pear ( <i>Pyrus communis</i> , <i>P. bretschneideri</i> )                         | <i>PcPIN-L</i> : PCP021016 ( <i>P. communis</i> genome v1.0)                                                                                                                                                                                                                                                                                                        | Aihuali x Chili' ( <i>P. bretschneideri</i> Rehd.), Aihuali, Chili                                                                     | Comparative gene expression between cultivars, across tissue types; subcellular localization; promoter activity; overexpression in tobacco, IAA quantification | Lower <i>PcPIN-L</i> expression in leaves, stems, roots, and seeds of pears exhibiting dwarfism; higher IAA content in shoot tips and lower IAA content in stems of pears exhibiting dwarfism; taller plants with longer cells in the stem, longer and more lateral roots in <i>PcPIN-L</i> overexpressing tobacco lines | [58] |
| <b>PIN1, PIN3</b> | Apple ( <i>Malus robusta</i> , <i>M. spectabilis</i> )                            | <i>MrPIN1</i> : MDP0000138035<br><i>MrPIN3</i> : MDP0000497581 ( <i>M. domestica</i> genome v1.0)                                                                                                                                                                                                                                                                   | <u>Rootstock</u> : <i>M. robusta</i><br><u>Scion</u> : <i>M. spectabilis</i> Bly114 (Standard) and more-branching mutant ( <i>MB</i> ) | Gene expression (transcriptome and qPCR) and phenotypes of grafted plants, sugar and hormone quantification across tissues                                     | The more-branching ( <i>MB</i> ) mutant repressed rootstock growth, and glycolysis and tricarboxylic acid activities. Rootstocks grafted with <i>MB</i> showed reduced <i>MrPIN1</i> expression, and increased <i>MrPIN3</i> expression.                                                                                 | [46] |
| <b>PIN family</b> | Pear ( <i>Pyrus bretschneideri</i> , <i>P. betulifolia</i> , <i>P. communis</i> ) | <i>PbPIN1-1</i> : LOC103946937<br><i>PbPIN1-2</i> : LOC103950573<br><i>PbPIN1-3</i> : LOC103933990<br><i>PbPIN1-4</i> : LOC103960490<br><i>PbPIN2-1</i> : LOC103941631<br><i>PbPIN2-2</i> : LOC103950477<br><i>PbPIN3-1</i> : LOC103947028<br><i>PbPIN3-2</i> : LOC103948593<br><i>PbPIN3-3</i> : LOC103948670<br><i>PbPIN4</i> : LOC103931858<br><i>PbPIN5-1</i> : | <u>Rootstock</u> : Douli<br><u>Interstems</u> : OHF51, QN101<br><u>Scion</u> : Xueqing                                                 | Comparative gene expression between cultivars                                                                                                                  | Compared <i>PbPIN</i> gene expression among different tissues of dwarfing OHF51 and vigorous QN101 rootstock cultivars, finding differential expression across tissues. Many <i>PbPINs</i> had higher shoot tip expression in the dwarfing rootstocks.                                                                   | [61] |

*LOC103930394*  
*PbPIN5-2:*  
*LOC103938552*  
*PbPIN6:*  
*LOC103951142*  
*PbPIN8:*  
*LOC103934837*  
 (Genbank)

|                |                                                                                                                                                                                                                                          |                                                                                                                                       |                                                                                                                                                                                                            |      |
|----------------|------------------------------------------------------------------------------------------------------------------------------------------------------------------------------------------------------------------------------------------|---------------------------------------------------------------------------------------------------------------------------------------|------------------------------------------------------------------------------------------------------------------------------------------------------------------------------------------------------------|------|
| Arabidopsis    | <i>AtPIN1: At1g73590</i><br><i>AtPIN2: At5g57090</i><br><i>AtPIN3: At1g70940</i><br><i>AtPIN4: At2g01420</i><br><i>AtPIN5: At5g16530</i><br><i>AtPIN6: At2g77110</i><br><i>AtPIN7: At1g23080</i><br><i>AtPIN8: At5g15100</i><br>(TAIR10) | Review of PIN protein evolution, protein structure, genomic structure, expression patterns, subcellular mechanisms, mutant phenotypes | Mutations in one or more <i>PIN</i> genes can lead to pin-like inflorescences, floral defects, gravitropism defects in the shoot or root, fused leaves or cotyledons, and loss of apical-basal patterning. | [38] |
| Across kingdom | All plants                                                                                                                                                                                                                               | Review of the role of auxin transport in branching forms across the plant kingdom                                                     | PIN proteins, via polar auxin transport, regulate branch initiation, branch outgrowth, and branch angle in flowering plants.                                                                               | [48] |

#### AUX/LAX

|                   |                                  |                                                                                                                                                 |                                                            |                                                                                                                             |                                                                                                                                                                                                                                                                              |      |
|-------------------|----------------------------------|-------------------------------------------------------------------------------------------------------------------------------------------------|------------------------------------------------------------|-----------------------------------------------------------------------------------------------------------------------------|------------------------------------------------------------------------------------------------------------------------------------------------------------------------------------------------------------------------------------------------------------------------------|------|
| <b>AUX1, LAX2</b> | Apple ( <i>Malus domestica</i> ) | <i>MdLAX2:</i><br><i>MDP0000020317,</i><br><i>MDP0000155074</i><br><i>MdAUX1:</i><br><i>MDP0000155113</i><br>( <i>M. domestica</i> genome v1.0) | <u>Rootstock:</u><br>M9, M27, M793<br>Scion:<br>Royal Gala | Gene expression (transcriptome and qPCR) comparing dwarfing (M27, M9) and vigorous (M793) rootstocks, carbohydrate analysis | Dwarfing rootstocks exhibited a downregulation of <i>MdAUX1</i> and <i>MdLAX2</i> auxin transporters, among other differentially expressed genes. Further, starch synthesis was upregulated, and dwarfing rootstocks contained higher starch and lower fructose and glucose. | [47] |
|-------------------|----------------------------------|-------------------------------------------------------------------------------------------------------------------------------------------------|------------------------------------------------------------|-----------------------------------------------------------------------------------------------------------------------------|------------------------------------------------------------------------------------------------------------------------------------------------------------------------------------------------------------------------------------------------------------------------------|------|

|                                   |                                     |                                                                                                                                                                           |                                                                                                                      |                                                                                                                                                            |                                                                                                                                                                                                                                                                                                                                                                           |      |
|-----------------------------------|-------------------------------------|---------------------------------------------------------------------------------------------------------------------------------------------------------------------------|----------------------------------------------------------------------------------------------------------------------|------------------------------------------------------------------------------------------------------------------------------------------------------------|---------------------------------------------------------------------------------------------------------------------------------------------------------------------------------------------------------------------------------------------------------------------------------------------------------------------------------------------------------------------------|------|
| <b>AUX1</b>                       | Apple<br>( <i>Malus domestica</i> ) | <i>MdAUX1</i> :<br><i>MDP0000885425</i><br>( <i>M. domestica</i><br>genome v1.0)                                                                                          | Hanfu (diploid<br>and autotetraploid<br>seedlings)                                                                   | Phenotyping,<br>Gene expression<br>(Tag-seq and<br>qPCR)<br>comparing<br>diploids and<br>autotetraploids                                                   | Autotetraploid plants<br>exhibited dwarfism. <i>AUX1</i><br>was found to be<br>downregulated, in addition<br>to changes in<br>brassinosteroid gene<br>expression (see below).                                                                                                                                                                                             | [45] |
| <b>AUX1/<br/>LAX<br/>family</b>   | All plants<br>(focus on<br>models)  | <i>AUX1/LAX</i> genes<br>across species                                                                                                                                   |                                                                                                                      | Review                                                                                                                                                     | Auxin transport, via<br><i>AUX1/LAX</i> proteins,<br>PINs, and PGP/ABCs,<br>plays a major role in many<br>architecture-related<br>developmental processes,<br>such as root development<br>(primary and lateral root,<br>gravitropism, root hairs),<br>phyllotactic patterning, leaf<br>morphogenesis, and<br>inflorescence architecture.                                  | [59] |
| <b>IGT</b>                        |                                     |                                                                                                                                                                           |                                                                                                                      |                                                                                                                                                            |                                                                                                                                                                                                                                                                                                                                                                           |      |
| <b>TAC1</b>                       | <i>Prunus persica</i>               | <i>PpeTAC1</i> :<br><i>Ppa010082</i><br>( <i>P. persica</i> genome<br>v1.0)<br><i>AtTAC1</i> : <i>At2g46640</i><br>(TAIR10)                                               | Crimson Rocket                                                                                                       | Pnome to map<br>pillar mutation,<br>gene expression,<br>branch and<br>flower bud angle<br>phenotypes,<br><i>AtTAC1</i><br>overexpression in<br>Arabidopsis | Pillar peach variety<br>“Crimson Rocket” has<br>insertion within <i>PpeTAC1</i><br>gene. Overexpression of<br><i>AtTAC1</i> in Arabidopsis<br>leads to narrow branch<br>angles. <i>PpeTAC1</i> and<br><i>AtTAC1</i> are expressed in<br>branch tips.                                                                                                                      | [42] |
| <b>TAC1,<br/>LAZY1,<br/>LAZY2</b> | Apple<br>( <i>Malus domestica</i> ) | <i>MdoTAC1a</i> :<br><i>MG837476</i><br><i>MdoTAC1b</i> :<br><i>MG837477</i><br><i>MdoLAZY1</i> :<br><i>MG837478</i><br><i>MdoLAZY2</i> :<br><i>MG837479</i><br>(Genbank) | <u>Rootstock</u> :<br><i>Malus robusta</i><br><u>Scion</u> :<br>McIntosh, Wjczik,<br>Granny Smith,<br>Fukushima spur | Gene expression<br>(qPCR)<br>comparing<br>cultivars<br>representative of<br>four architectural<br>ideotypes.                                               | Comparison of <i>IGT</i> gene<br>expression between<br>McIntosh (standard),<br>Fukushima spur (spur),<br>Granny Smith (tip-<br>bearing), and Wjczik<br>(columnar), showed<br>decreasing levels of <i>TAC1</i><br>in shoot tips in that cultivar<br>order, with the lowest<br>expression of all identified<br><i>IGT</i> genes in the columnar<br>cultivar in all tissues. | [55] |

|                       |                                                                                            |                                                                                                                                                                                        |                                                                                                                  |                                                                                                                                                       |                                                                                                                                                                                                                                                                                                                                                                                                                                                                   |      |
|-----------------------|--------------------------------------------------------------------------------------------|----------------------------------------------------------------------------------------------------------------------------------------------------------------------------------------|------------------------------------------------------------------------------------------------------------------|-------------------------------------------------------------------------------------------------------------------------------------------------------|-------------------------------------------------------------------------------------------------------------------------------------------------------------------------------------------------------------------------------------------------------------------------------------------------------------------------------------------------------------------------------------------------------------------------------------------------------------------|------|
| <b>DRO1</b>           | Apple<br>( <i>Malus domestica</i> )                                                        | <i>MdDRO1</i> :<br>MDP0000142588<br><i>MdDRO2</i> :<br>MDP0000151294<br><i>MdDRO3</i> :<br>MDP0000723826<br><i>MdPIN11</i> :<br>MDP0000125862<br>( <i>M. domestica</i><br>genome v1.0) | <u>Rootstock</u> :<br>M9, Baleng Crab<br>and interspecific<br>hybrids from M9<br>x BC cross (rooted<br>cuttings) | Root angle<br>phenotyping,<br>gene expression<br>(qPCR in roots<br>tissue), IAA<br>quantification                                                     | Deep-rooted Baleng Crab<br>had steeper root angles, and<br>greater root length than<br>M9. M9 showed lower IAA<br>content, higher IAA<br>oxidase activity, fewer<br>amyloplasts, and lower<br>expression of <i>MdDRO1</i><br>and <i>MdPIN11</i> architecture-<br>associated genes.                                                                                                                                                                                | [50] |
|                       | Plum<br>( <i>Prunus domestica</i> ),<br>Peach<br>( <i>Prunus persica</i> ),<br>Arabidopsis | <i>PpeDRO1</i> :<br>Ppa021925<br>( <i>P. persica</i> genome<br>v1.0)<br><i>AtDRO1</i> : At1g72490<br><i>AtDRO2</i> : At1g19115<br><i>AtDRO3</i> : At1g17400<br>(TAIR10)                | Plum seedlings:<br>Stanley<br>Arabidopsis:<br>Columbia                                                           | Gene expression<br>(qPCR, GUS),<br>root angle<br>phenotyping,<br>root<br>gravitropism,<br><i>DRO1</i><br>overexpression in<br>plum and<br>Arabidopsis | <i>DRO1</i> and <i>DRO2</i> are<br>expressed in roots in<br>Arabidopsis and peach.<br>atdro1 mutants had wider<br>lateral root angles, but no<br>difference in primary root<br>gravitropism. <i>AtDRO1</i> OE<br>Arabidopsis had narrower<br>lateral root branch angles,<br>distinct upward leaf<br>curling, shorter siliques,<br>narrower shoot branch<br>angle. <i>PpeDRO1</i> OE plum<br>roots were longer with<br>greater root/shoot weight<br>than controls. | [49] |
| <b>IGT<br/>Family</b> | Across<br>kingdom                                                                          | <i>IGT</i> gene across<br>species                                                                                                                                                      |                                                                                                                  | Review of <i>IGT</i><br>gene studies<br>from the 1930's<br>to the present,<br>phylogenetic<br>analysis                                                | <i>IGT</i> genes influence<br>growth angle/gravitropic<br>set point angle of both<br>shoots and roots, which<br>affects access to water and<br>nutrients, density of<br>plantings, structural<br>integrity and soil<br>anchorage, and overall crop<br>productivity.                                                                                                                                                                                               | [34] |

## GID1



|                             |                                    |                                                                                                                                                                                              |                                                                                |                                                                                                                                                                     |                                                                                                                                                                                                                                                                                                                                                             |      |
|-----------------------------|------------------------------------|----------------------------------------------------------------------------------------------------------------------------------------------------------------------------------------------|--------------------------------------------------------------------------------|---------------------------------------------------------------------------------------------------------------------------------------------------------------------|-------------------------------------------------------------------------------------------------------------------------------------------------------------------------------------------------------------------------------------------------------------------------------------------------------------------------------------------------------------|------|
| <b>GID1c</b>                | Peach<br>( <i>Prunus persica</i> ) | <i>PpeGID1c</i> :<br><i>Ppa018174</i><br>( <i>P. persica</i> genome v1.0)                                                                                                                    | Brachytic dwarf (BD), Standard, and a mapping population from a BD x Std cross | Pnome to map <i>dw</i> mutation, phenotyping and GA application response, RNAi silencing of <i>GID1c</i> in plum, gene expression (qPCR)                            | BD peaches exhibit extreme dwarfism, primarily attributed to reduced internode length. The <i>dw</i> mutation in BD peaches was mapped to <i>PpeGID1c</i> . BD peaches showed insensitivity to GA treatment. Silencing <i>GID1c</i> in plums led to a BD-like dwarfed phenotype.                                                                            | [44] |
|                             |                                    |                                                                                                                                                                                              | FenHuaShouXing Tao (FHSXT), QiuMiHong (QMH)                                    | Phenotyping of dwarf (FHSXT) and Standard (QMH) cultivars, GA response and quantification, gene expression (qPCR), yeast-2-hybrid, protein quantification (western) | FHSXT exhibited extreme dwarfism, short internodes, shorter cell length, fewer branches, and longer leaves. FHSXT had high levels of GA and were GA insensitive. <i>GID1c</i> was upregulated in FHSXT, as were multiple GA biosynthesis genes (see below). The mutation in FHSXT <i>GID1c</i> abolished interaction with DELLA1 in a yeast-2-hybrid assay. | [56] |
| <b>GID1</b>                 | Arabidopsis                        | <i>AtGID1a</i> :<br><i>At3g05120</i> ,<br><i>AtGID1b</i> :<br><i>At3g63010</i> ,<br><i>AtGID1c</i> :<br><i>At5g27320</i><br>(TAIR10)                                                         | Columbia                                                                       | Phenotyping mutants, gene expression (qPCR), GA treatment and quantification                                                                                        | Double mutants <i>atgid1a atgid1c</i> and <i>atgid1a atgid1b</i> showed reduced stem height phenotypes, while the triple mutant exhibited severe dwarfing and GA insensitivity. The triple mutant phenotype was partially rescued by loss of function of the DELLA protein AtRGA.                                                                           | [36] |
| <b>GA2ox, GA3ox, GA20ox</b> |                                    |                                                                                                                                                                                              |                                                                                |                                                                                                                                                                     |                                                                                                                                                                                                                                                                                                                                                             |      |
| <b>GA2ox</b>                | Peach<br>( <i>Prunus persica</i> ) | <i>PpeGA2ox-1</i> :<br><i>Prupe.1G111900</i><br><i>PpeGA2ox-2</i> :<br><i>Prupe.1G344000</i><br><i>PpeGA2ox-3</i> :<br><i>Prupe.3G006700</i><br><i>PpeGA2ox-4</i> :<br><i>Prupe.4G026300</i> | QiuMiHong (QMH)                                                                | Gene expression (qPCR), <i>PpeGA2ox</i> gene overexpression in tobacco, GA treatment and quantification                                                             | Seven <i>GA2ox</i> genes were identified in peach and classified into three subgroups, and tissue-specific expression was determined in a standard peach cultivar. Overexpression of                                                                                                                                                                        | [63] |

|                                                 |                                  |                                                                                                                                                                                                                                                                                                                       |                                                                            |                                                                                                               |                                                                                                                                                                                                                                                                |      |
|-------------------------------------------------|----------------------------------|-----------------------------------------------------------------------------------------------------------------------------------------------------------------------------------------------------------------------------------------------------------------------------------------------------------------------|----------------------------------------------------------------------------|---------------------------------------------------------------------------------------------------------------|----------------------------------------------------------------------------------------------------------------------------------------------------------------------------------------------------------------------------------------------------------------|------|
|                                                 |                                  | <p><i>PpeGA2ox-5:</i><br/><i>Prupe.4G080700</i><br/><i>PpeGA2ox-6:</i><br/><i>Prupe.4G150200</i><br/><i>PpeGA2ox-7:</i><br/><i>Prupe.4G204600</i><br/>(<i>P. persica</i> genome v2.0)</p>                                                                                                                             |                                                                            |                                                                                                               | <p><i>PpeGA2ox1</i>, <i>PpeGA2ox5</i>, and <i>PpeGA2ox2</i> resulted in dwarf phenotypes in tobacco. GA treatment at shoot tips induced expressions of all <i>PpeGA2ox</i> genes, but at different rates.</p>                                                  |      |
|                                                 | <i>Arabidopsis thaliana</i>      | <p><i>AtGA2ox1:</i><br/><i>At1g78440</i><br/><i>AtGA2ox2:</i><br/><i>At1g30040</i><br/><i>AtGA2ox3:</i><br/><i>At2g34555</i><br/><i>AtGA2ox4:</i><br/><i>At1g47990</i><br/><i>AtGA2ox6:</i><br/><i>At1g02400</i><br/><i>AtGA2ox7:</i><br/><i>At1g50960</i><br/><i>AtGA2ox8:</i><br/><i>At4g21200</i><br/>(TAIR10)</p> | Columbia-o and <i>hy5</i> mutant                                           | Gene expression (GUS reporters, qPCR), <i>GA2ox</i> overexpression                                            | Overexpression of <i>GA2ox</i> genes inhibited elongation of the hypocotyl, rescued the long-hypocotyl phenotype of <i>hy5</i> mutants. Overexpression of <i>GA2ox7</i> and 8 led to extra shortening of the hypocotyl in <i>hy5</i> mutants.                  | [57] |
| <b>GA20ox</b>                                   | Apple ( <i>Malus domestica</i> ) | <p><i>MpGA20ox1A</i><br/><i>MpGA20ox1B</i><br/>(Noted from <i>M. pumila</i>, a previous name for <i>M. domestica</i>. Gene IDs unclear)</p>                                                                                                                                                                           | <p><u>Rootstock:</u><br/>M25, MM106<br/><u>Scion:</u><br/>Greensleeves</p> | Gene expression (qPCR), gene silencing, phenotyping, grafting onto invigorating rootstocks, GA quantification | Silencing of <i>MpGA20ox1A</i> and <i>B</i> led to reduced height, and reduced internode length and number. Application of exogenous GA rescued the dwarfed phenotype. Transgenic dwarfed scions remained dwarfed after grafting onto invigorating rootstocks. | [35] |
| <b>GA2ox,</b><br><b>GA3ox,</b><br><b>GA20ox</b> | Peach ( <i>Prunus persica</i> )  |                                                                                                                                                                                                                                                                                                                       | FenHuaShouXing Tao (FHSXT), QiuMiHong (QMH)                                | See above ( <i>GID1</i> )                                                                                     | Expression of several <i>GA2ox</i> , <i>GA3ox</i> , and <i>GA20ox</i> GA biosynthesis genes were upregulated in a dwarfed variety (FHSXT), as was <i>GID1c</i> (see above).                                                                                    | [56] |

WRKY9

|              |                                     |                                                                                                                |                                                                                                                                                                                                                         |                                                                                                                                                                |                                                                                                                                                                                                                                                                                                                                                                   |      |
|--------------|-------------------------------------|----------------------------------------------------------------------------------------------------------------|-------------------------------------------------------------------------------------------------------------------------------------------------------------------------------------------------------------------------|----------------------------------------------------------------------------------------------------------------------------------------------------------------|-------------------------------------------------------------------------------------------------------------------------------------------------------------------------------------------------------------------------------------------------------------------------------------------------------------------------------------------------------------------|------|
| <b>WRKY9</b> | Apple<br>( <i>Malus domestica</i> ) | <i>MdWRKY9</i> :<br><i>MDP0000272940</i><br>( <i>M. domestica</i><br>genome v1.0)                              | <u>Dwarfing rootstock</u> :<br>M.9 Pajam 2,<br>M26, GM256, B9<br>and M.9 T337<br><u>Non-dwarfing rootstock</u> :<br><i>M. baccata</i> , <i>M. robusta</i> , <i>M. sieversii</i> , <i>M. prunifolia</i> , <i>M. zumi</i> | Gene expression (qPCR), <i>MdWRKY9</i> overexpression in apple, subcellular localization, transcriptional inhibition assays, hormone quantification, CHIP-qPCR | <i>MdWRKY9</i> was more highly expressed in dwarfing rootstock. Overexpression of <i>MdWRKY9</i> in M26 semi-dwarfing rootstock resulted in dwarfed characteristics, and fewer, but longer roots. <i>MdWRKY9</i> binds and inhibits expression of the brassinosteroid biosynthetic gene <i>MdDWF4</i> (see below)                                                 | [54] |
| <b>EIN2</b>  |                                     |                                                                                                                |                                                                                                                                                                                                                         |                                                                                                                                                                |                                                                                                                                                                                                                                                                                                                                                                   |      |
| <b>EIN2</b>  | Rice ( <i>Oryza sativa</i> )        | <i>OsEIN2</i> :<br><i>LOC_Os07g06130</i><br><i>OsEIL1</i> :<br><i>LOC_Os03g20790</i><br>(MSU Rice Gene Models) | Nipponbare                                                                                                                                                                                                              | Computed tomography (CT), mutant analysis, confocal microscopy, ethylene treatment and quantification, gas barrier treatment, GUS assay, ethylene biosensor    | Ethylene-insensitive signaling mutants ( <i>osein2</i> and <i>oseil1</i> ) were unaffected by and grew deeper into compacted soil. Shoot and root biomass was increased in ethylene-insensitive mutants grown in compacted soil. Ethylene was slow to diffuse through compacted soils and ethylene detection in the root was shown to increase in compacted soil. | [64] |
|              | <i>Arabidopsis thaliana</i>         | <i>AtEIN2</i> : <i>At5g03280</i><br>(TAIR10)                                                                   | Columbia                                                                                                                                                                                                                | Gene expression (GUS), root architecture phenotyping on differing Boron concentrations, mutant analysis                                                        | Ethylene-insensitive mutant <i>atein2-1</i> inhibited increased root hair formation and elongation under low-Boron conditions.                                                                                                                                                                                                                                    | [39] |

|                   |                                  |                                                                                                                                                                                                                     |                                                                                                                                                                                                                 |                                                                                                                                                                   |                                                                                                                                                                                                                                                                                                                                                                                                                                           |      |
|-------------------|----------------------------------|---------------------------------------------------------------------------------------------------------------------------------------------------------------------------------------------------------------------|-----------------------------------------------------------------------------------------------------------------------------------------------------------------------------------------------------------------|-------------------------------------------------------------------------------------------------------------------------------------------------------------------|-------------------------------------------------------------------------------------------------------------------------------------------------------------------------------------------------------------------------------------------------------------------------------------------------------------------------------------------------------------------------------------------------------------------------------------------|------|
|                   | All species                      | Ethylene signaling and biosynthesis genes                                                                                                                                                                           |                                                                                                                                                                                                                 | Review of ethylene effects on root and hypocotyl elongation, root hair formation, apical hook formation, stem growth, biosynthesis pathway, and signaling pathway | Inhibitory effects of ethylene on root growth observed as early as 1901. Plant grown on aerated soils have high ethylene and strong root growth inhibition when treated with ethylene. Ethylene interacts with GA and auxin pathways to regulate root growth, as well as JA and auxin pathways to regulate root hair formation. Ethylene plays a role in inhibiting stem growth, and can also stimulate stem growth in shaded conditions. | [37] |
| <b>DWF1, DWF4</b> |                                  |                                                                                                                                                                                                                     |                                                                                                                                                                                                                 |                                                                                                                                                                   |                                                                                                                                                                                                                                                                                                                                                                                                                                           |      |
| <b>DWF1, DWF4</b> | Apple ( <i>Malus domestica</i> ) | <i>MdDWF1-1</i> : MD13G1007700<br><i>MdDWF1-2</i> : MD16G1000400<br><i>MdDWF4-1</i> : MD02G1149000<br><i>MdDWF4-2</i> : MD15G1263900<br><i>MdDWF4-3</i> : MD17G1120200<br>( <i>M. domestica</i> GDDH13 genome v1.1) | Rooted seedlings: M.9-T337, Yanfu No. 6 (YF), Nagafu No. 2 (CF), <i>M. hupehensis</i> Rootstock: M.9, CF Scion: CF                                                                                              | Phylogeny, synteny analysis, gene expression (qPCR), hormone treatment and quantification                                                                         | YF trees are spur type and have lower shoot elongation rate, number of internodes, and average internode length relative to CF. <i>mddwf1-1</i> and <i>mddwf1-2</i> are highly expressed in CF relative to YF. CF/M.9 (dwarf) trees have lower <i>mddwf4</i> and <i>mddwf1</i> expression relative to CF/CF.                                                                                                                              | [52] |
| <b>DWF4</b>       | Apple ( <i>Malus domestica</i> ) | <i>MdDWF4</i> : MDP0000498540<br>( <i>M. domestica</i> genome v1.0)                                                                                                                                                 | <u>Dwarfing rootstock</u> : M.9 Pajam 2, M26, GM256, B9 and M.9 T337<br><u>Non-dwarfing rootstock</u> : <i>M. baccata</i> , <i>M. robusta</i> , <i>M. sieversii</i> , <i>M. prunifolia</i> , and <i>M. zumi</i> | Gene expression (qPCR), <i>MdWRKY9</i> overexpression in apple, subcellular localization, transcriptional inhibition assays, hormone quantification, CHIP-qPCR    | Overexpression of <i>MdWRKY9</i> in apple resulted in significantly lower expression of <i>mddwf4</i> and lower brassinosteroid content. <i>MdWRKY9</i> binds and inhibits expression of the brassinosteroid biosynthetic gene <i>MdDWF4</i> (see above).                                                                                                                                                                                 | [54] |

|                       |                                     |                                                                                                                                                                                                                                                     |                                                                                                                       |                                                                                                                                                         |                                                                                                                                                                                                                                                                                                                                                                                                                                                                                                                                                       |      |
|-----------------------|-------------------------------------|-----------------------------------------------------------------------------------------------------------------------------------------------------------------------------------------------------------------------------------------------------|-----------------------------------------------------------------------------------------------------------------------|---------------------------------------------------------------------------------------------------------------------------------------------------------|-------------------------------------------------------------------------------------------------------------------------------------------------------------------------------------------------------------------------------------------------------------------------------------------------------------------------------------------------------------------------------------------------------------------------------------------------------------------------------------------------------------------------------------------------------|------|
| <b>DWF1,<br/>DWF4</b> | Arabidopsis,<br>Tomato              | <i>AtDWF1</i> :<br><i>At3g19820</i><br><i>AtDWF4</i> :<br><i>At3g50660</i><br>(TAIR10)                                                                                                                                                              |                                                                                                                       | Review of multiple BR biosynthetic genes, pathways, and mutant phenotypes and chemicals that led to these findings                                      | <i>dwf</i> mutants exhibit extreme dwarfism, with additional alteration in leaf and inflorescence development. DWARF1 is a biosynthetic enzyme involved in reducing C24 of BR. DWARF4 is a cytochrome P450 enzyme involved in hydroxylating C22 of BR and represents a rate-limiting step in biosynthesis.                                                                                                                                                                                                                                            | [33] |
| <b>IPT3</b>           |                                     |                                                                                                                                                                                                                                                     |                                                                                                                       |                                                                                                                                                         |                                                                                                                                                                                                                                                                                                                                                                                                                                                                                                                                                       |      |
| <b>IPT3</b>           | Apple<br>( <i>Malus domestica</i> ) | <i>MdPIN1</i> : Unclear. Degenerate primers designed based on Arabidopsis, lupin, pea, and <i>Populus</i> sequences.<br><i>MdIPT3</i> : Unclear. Degenerate primers designed based on <i>Malus hupehensis</i> , Arabidopsis, and cabbage sequences. | <u>Rootstock</u> :<br>M9 and MM ( <i>M. x micromalus</i> )<br><u>Scion</u> :<br>Red Fuji<br><u>Interstock</u> :<br>M9 | Gene expression (qPCR), hormone quantification, grafting substitution experiments (rootstock substitutions, rootstock bridging, and bark substitutions) | M9 (common dwarfing rootstock) seedlings showed lower <i>PIN1</i> and <i>IPT3</i> expression, as well as lower auxin and zeatin across different plant tissues, compared with MM seedlings. Grafting combinations including M9 as rootstock or standard interstock similarly frequently had reduced <i>PIN1</i> and <i>IPT3</i> expression and reduced hormone levels compared with MM grafting combinations. The reduced levels were largely rescued when MM or Red Fuji were introduced as rootstock substitutions, bridged, or bark substitutions. | [40] |
|                       | Arabidopsis                         | <i>AtIPT3</i> : <i>At3g63110</i><br><i>AtIPT5</i> : <i>At5g19040</i><br><i>AtAHK2</i> : <i>At5g35750</i><br><i>AtAHK3</i> : <i>At1g27320</i><br><i>AtAHK4</i> : <i>At2g01830</i><br>(TAIR10)                                                        | Col-0                                                                                                                 | Root architecture phenotyping, gene expression (GUS), hormone treatments, overexpression of cytokinin catabolism genes, mutant                          | Increasing concentrations of cytokinin led to decreases in lateral root (LR) density. Loss of <i>IPT3</i> and other <i>IPT</i> (cytokinin biosynthesis) genes resulted in increased LR formation and density. Similarly, loss of <i>AHK</i>                                                                                                                                                                                                                                                                                                           | [41] |

analysis of  
biosynthesis  
genes cytokinin receptor genes  
led to increased LR  
densities.

---

**MAX1, MAX2, MAX3, MAX4**

|                                           |                                     |                                                                                                                                                                                                                                                                                                                                                                           |                                                                                                                                         |                                                                                                                                                                           |                                                                                                                                                                                                                                                                                                                                                                                                                                                                            |      |
|-------------------------------------------|-------------------------------------|---------------------------------------------------------------------------------------------------------------------------------------------------------------------------------------------------------------------------------------------------------------------------------------------------------------------------------------------------------------------------|-----------------------------------------------------------------------------------------------------------------------------------------|---------------------------------------------------------------------------------------------------------------------------------------------------------------------------|----------------------------------------------------------------------------------------------------------------------------------------------------------------------------------------------------------------------------------------------------------------------------------------------------------------------------------------------------------------------------------------------------------------------------------------------------------------------------|------|
| <b>MAX1,<br/>MAX2,<br/>MAX3,<br/>MAX4</b> | Apple<br>( <i>Malus domestica</i> ) | <i>MdMAX1-1</i> :<br>MDP0000130133<br><i>MdMAX1-2</i> :<br>MDP0000677258<br><i>MdMAX1-3</i> :<br>MDP0000909874<br><i>MdMAX2-1</i> :<br>MDP0000466825<br><i>MdMAX3-1</i> :<br>MDP0000197409<br><i>MdMAX3-2</i> :<br>MDP0000139334<br><i>MdMAX4-1</i> :<br>MDP0000227870<br><i>MdMAX4-4</i> : Unclear<br>(Based on primer<br>sequences, <i>M. domestica</i> genome<br>v1.0) | <u>Standards</u> :<br>McIntosh<br>genotypes 21-S,<br>31-S, and 77-S<br><u>Columnar apples</u> :<br>Wijcik genotypes<br>21-C, 31-C, 77-C | Gene expression<br>(qPCR)<br>comparing<br>standard and<br>columnar<br>phenotypes,<br>strigolactone<br>quantification,<br>overexpression<br>of <i>MdCo31</i> in<br>tobacco | <i>MdMAX</i> gene expression<br>was frequently higher in<br>columnar apple buds and<br>shoots, as was expression<br>of <i>MdCo31</i> .<br>Overexpression of <i>MdCo31</i><br>in tobacco resulted in<br>plants with reduced height,<br>internode lengths, and<br>increase leaf thickness and<br>chlorophyll content.<br>Tobacco <i>MAX3</i> was<br>increased in these lines,<br>while tobacco <i>MAX1</i> was<br>upregulated only in the line<br>with the shortest stature. | [62] |
|-------------------------------------------|-------------------------------------|---------------------------------------------------------------------------------------------------------------------------------------------------------------------------------------------------------------------------------------------------------------------------------------------------------------------------------------------------------------------------|-----------------------------------------------------------------------------------------------------------------------------------------|---------------------------------------------------------------------------------------------------------------------------------------------------------------------------|----------------------------------------------------------------------------------------------------------------------------------------------------------------------------------------------------------------------------------------------------------------------------------------------------------------------------------------------------------------------------------------------------------------------------------------------------------------------------|------|

|                                    |                                                                                                                                                                             |                                                                                                                                                                                                                       |                                                                                                                         |                                                                                                                                                                                                                                                                                                                                                                                                                                                 |      |
|------------------------------------|-----------------------------------------------------------------------------------------------------------------------------------------------------------------------------|-----------------------------------------------------------------------------------------------------------------------------------------------------------------------------------------------------------------------|-------------------------------------------------------------------------------------------------------------------------|-------------------------------------------------------------------------------------------------------------------------------------------------------------------------------------------------------------------------------------------------------------------------------------------------------------------------------------------------------------------------------------------------------------------------------------------------|------|
| Peach<br>( <i>Prunus persica</i> ) | <i>PpeMAX1</i> :<br>Ppa003950m<br><i>PpeMAX2</i> :<br>Ppa002017m<br><i>PpeMAX3</i> :<br>Ppa017865m<br><i>PpeMAX4</i> :<br>Ppa006042m<br>( <i>P. persica</i> genome<br>v1.0) | <u>Rootstock</u> :<br>Lovell, Bailey,<br>Tennessee natural<br><u>Scion</u> :<br>Redhaven<br>(standard),<br>Harrow Beauty<br>(standard), Bounty<br>(standard),<br>Crimson Rocket<br>(pillar), Sweet-N-<br>Up (upright) | Gene expression<br>(qPCR),<br>hormone<br>quantification<br>between<br>standard, upright,<br>and pillar growth<br>habits | <i>PpeMAX3</i> and <i>PpeMAX4</i><br>expression was higher in in<br>stems following pruning.<br><i>PpeMAX3</i> expression and<br>auxin concentrations were<br>greater in the roots of pillar<br>phenotype. <i>PpeMAX1-4</i><br>expression was<br>intermediate between pillar<br>and standard. Expression of<br><i>PpeMAX1</i> , <i>PpeMAX2</i> , and<br><i>PpeMAX4</i> in roots were<br>higher in pillar, but not<br>statistically significant. | [43] |
|------------------------------------|-----------------------------------------------------------------------------------------------------------------------------------------------------------------------------|-----------------------------------------------------------------------------------------------------------------------------------------------------------------------------------------------------------------------|-------------------------------------------------------------------------------------------------------------------------|-------------------------------------------------------------------------------------------------------------------------------------------------------------------------------------------------------------------------------------------------------------------------------------------------------------------------------------------------------------------------------------------------------------------------------------------------|------|

---

|                       |                                                                                                       |                                                                                                                                                                                                                                 |                                                                                                                                                                                                                                                 |                                                                                                                                |                                                                                                                                                                                                    |      |
|-----------------------|-------------------------------------------------------------------------------------------------------|---------------------------------------------------------------------------------------------------------------------------------------------------------------------------------------------------------------------------------|-------------------------------------------------------------------------------------------------------------------------------------------------------------------------------------------------------------------------------------------------|--------------------------------------------------------------------------------------------------------------------------------|----------------------------------------------------------------------------------------------------------------------------------------------------------------------------------------------------|------|
| <b>MAX1,<br/>MAX2</b> | Apple<br>( <i>Malus<br/>spectabilis</i> ,<br><i>M.<br/>domestica</i> ,<br>and <i>M.<br/>robusta</i> ) | <i>MsMAX2</i> : Used<br>primers based on<br><i>MdMAX2</i><br>( <i>MD17G1266700</i> )<br><i>MsMAX1</i> : Used<br>primers based on<br><i>MdMAX1</i><br>( <i>MD15G1057600</i> )<br>( <i>M. domestica</i><br>GDDH13 genome<br>v1.1) | <u>Rootstock</u> :<br><i>M. robusta</i><br><u>Scion</u> :<br>More-Branching<br>( <i>MB</i> ) mutant and<br>wild type (WT) of<br><i>M. spectabilis</i><br>cultivar Bly114,<br><i>M. domestica</i><br>cultivars T337,<br>M26, and Fuji<br>Nagafu2 | Morphological<br>and anatomical<br>phenotypes,<br>hormone<br>quantification,<br>gene expression<br>(transcriptome<br>and qPCR) | <i>MB</i> mutants had decreased<br>height, increased branch<br>number, and narrower<br>branch angles. <i>MsMAX1</i><br>and <i>MsMAX2</i> were<br>upregulated in axillary<br>buds during outgrowth. | [60] |
|-----------------------|-------------------------------------------------------------------------------------------------------|---------------------------------------------------------------------------------------------------------------------------------------------------------------------------------------------------------------------------------|-------------------------------------------------------------------------------------------------------------------------------------------------------------------------------------------------------------------------------------------------|--------------------------------------------------------------------------------------------------------------------------------|----------------------------------------------------------------------------------------------------------------------------------------------------------------------------------------------------|------|

---

972

973

974 **Figures**

975

976 Figure 1

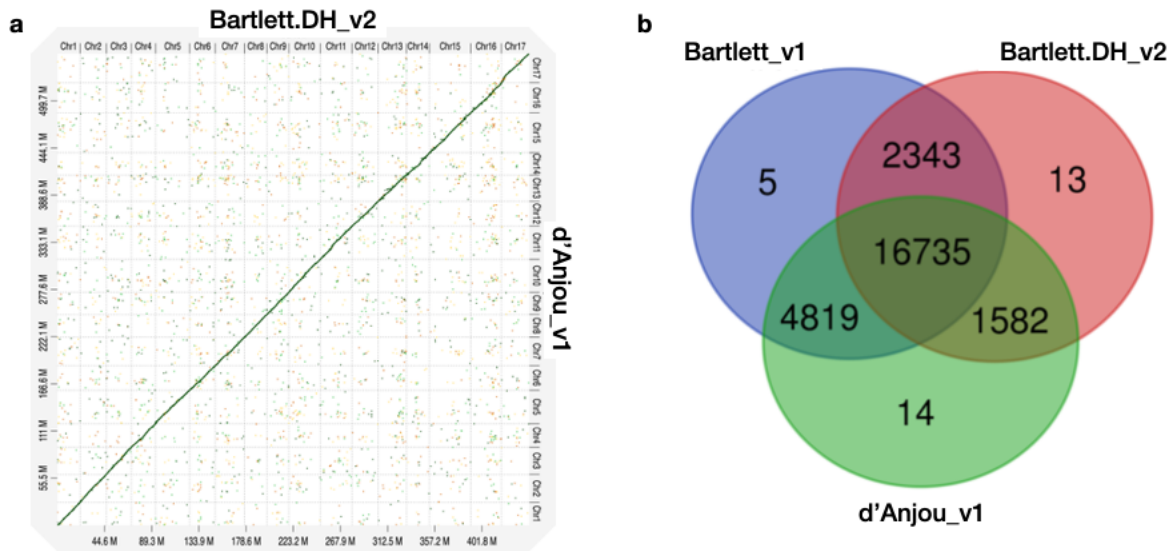

977

978

979 Figure 2

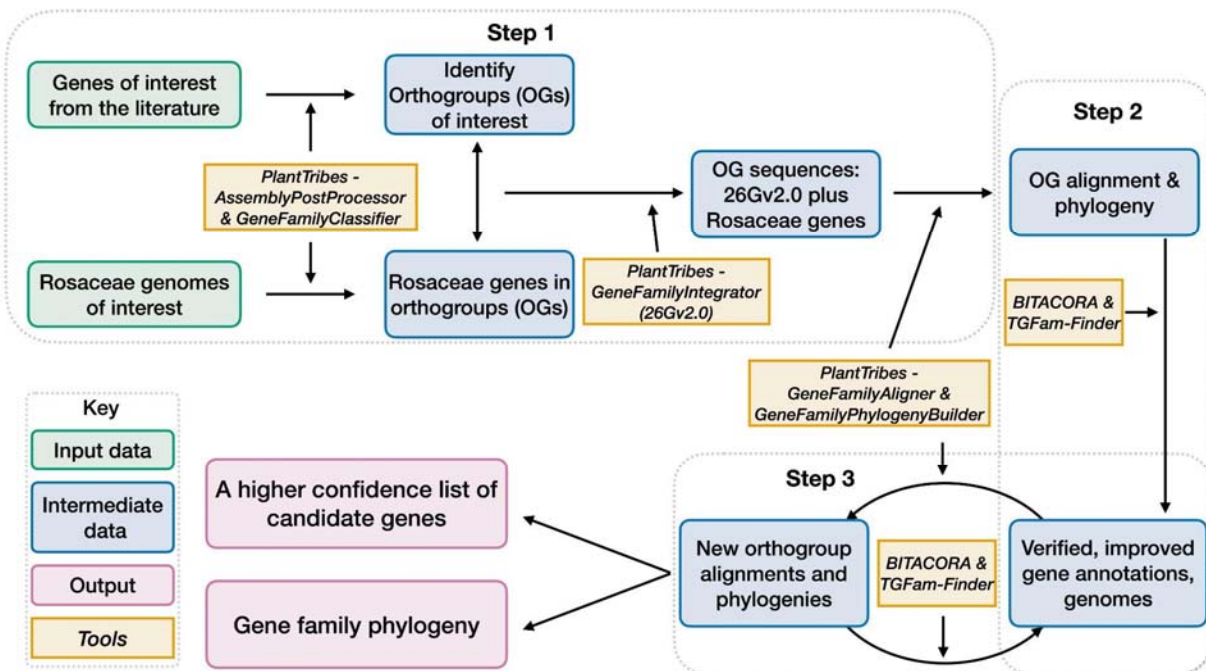

980

981

982





986 Figure 4

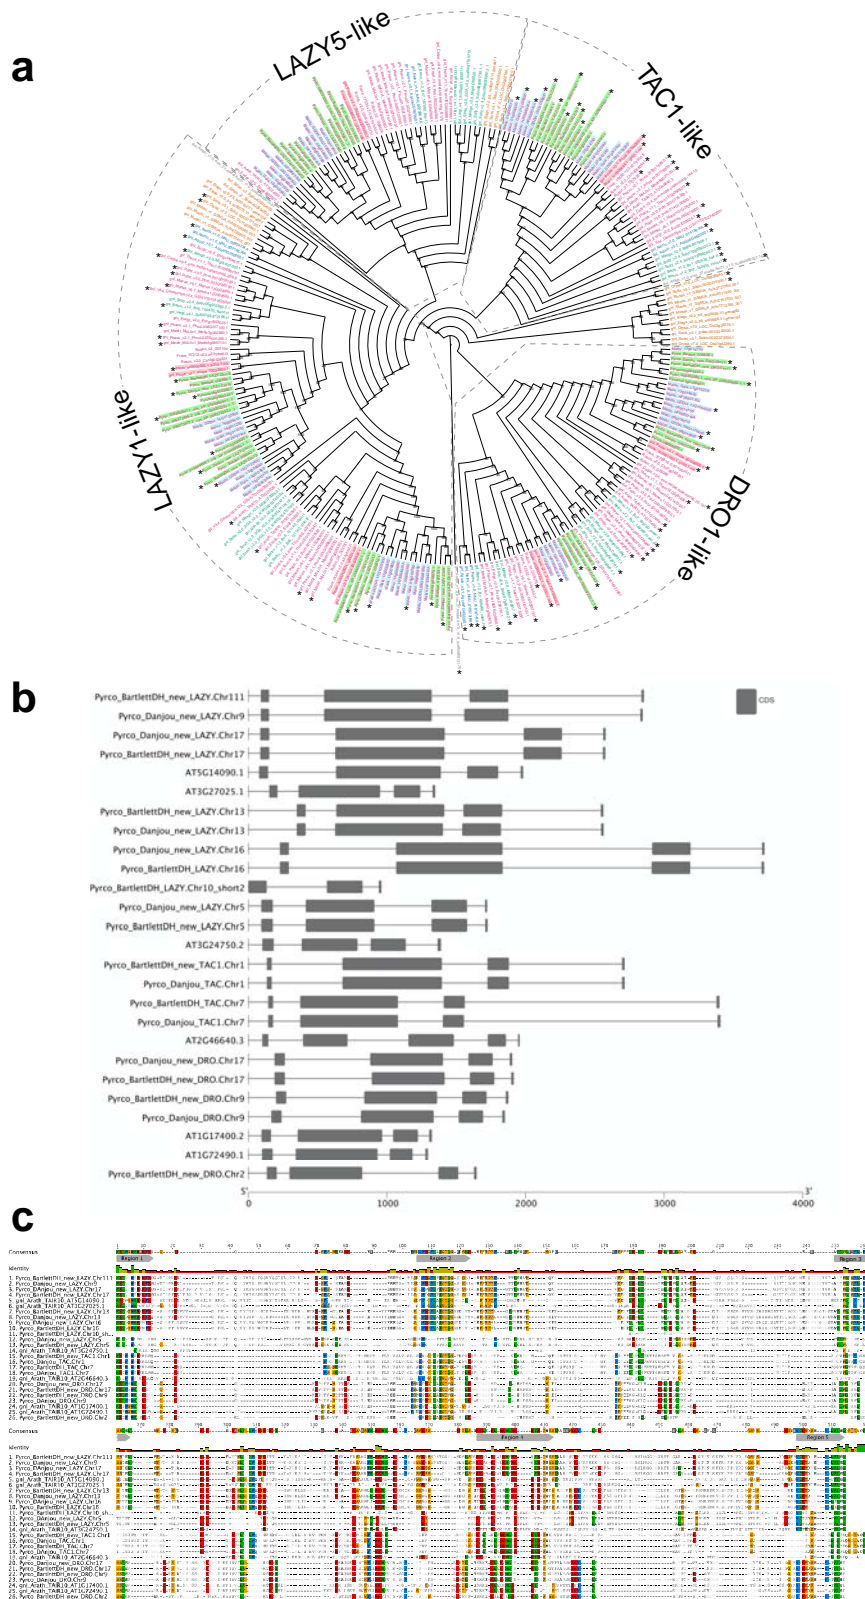

Source: https://www.biorxiv.org/content/biorxiv/early/2021/11/19/2021.11.17.467977.full.pdf
